# Supplementary material for: Synthesis and Characterization of a Nitrophenol Disubstituted BODIPY Halochromic Probe
Source: Research Square preprint supplement (doi:10.21203/rs.3.rs-7459615/v1), 2025-09-03
Supplement: Supplementary file 1 [file 8e718ffee6cb2f65e17bfed1.docx]

# Supplementary Information

Synthesis and Characterization of a Nitrophenol Disubstituted BODIPY Halochromic Probe

Riccardo Ossanna¹,2 Elise Michel2, Rachel Meallet1 Gilles Clavier2

1 Université Paris-Saclay, CNRS, Institut des Sciences Moléculaires d’Orsay, 91405 Orsay, France;

2 Université Paris-Saclay, ENS Paris-Saclay, CNRS, PPSM, 91190 Gif-sur-Yvette, France;

Content

[Supplementary Information 1](#_Toc206690206)

[1. NMR and HRMS spectra 2](#_Toc206690207)

[2. DFT 9](#_Toc206690208)

[3. UV–vis absorption and emission spectra of 4 16](#_Toc206690209)

[4. Solvatochromism 26](#_Toc206690210)

[5. References 30](#_Toc206690211)

# NMR and HRMS spectra


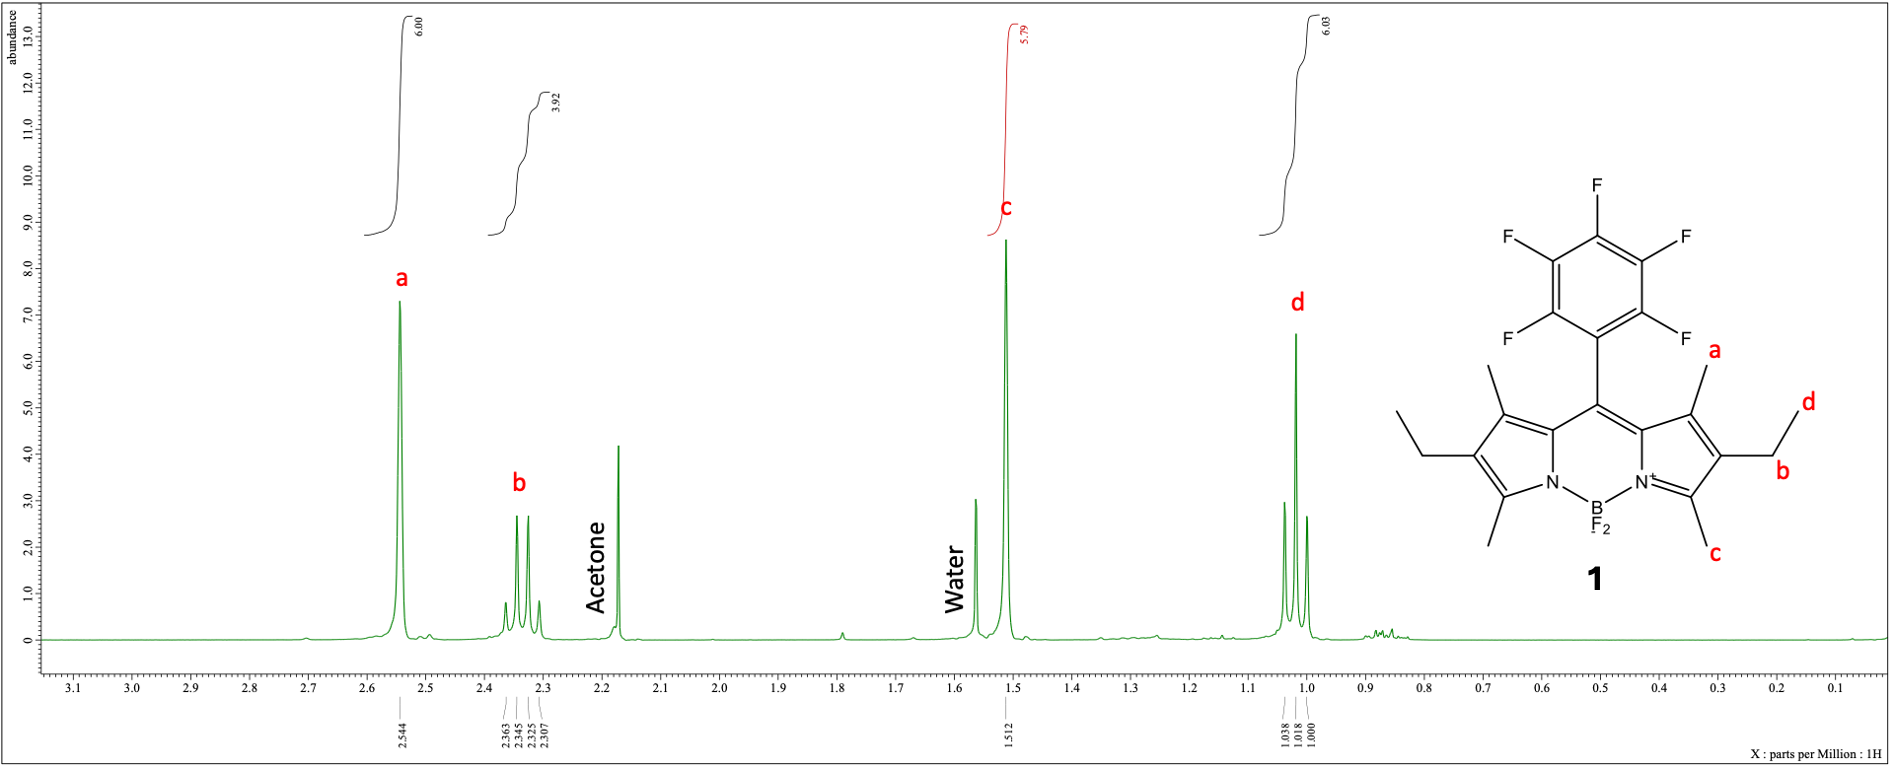


**Fig. S1** **Bodipy (1)** 1H-NMR (400 MHz, CHLOROFORM-D) δ 2.54 (s, 6H), 2.34 (q, J = 7.5 Hz, 4H), 1.51 (s, 6H), 1.02 (t, J = 7.6 Hz, 6H)


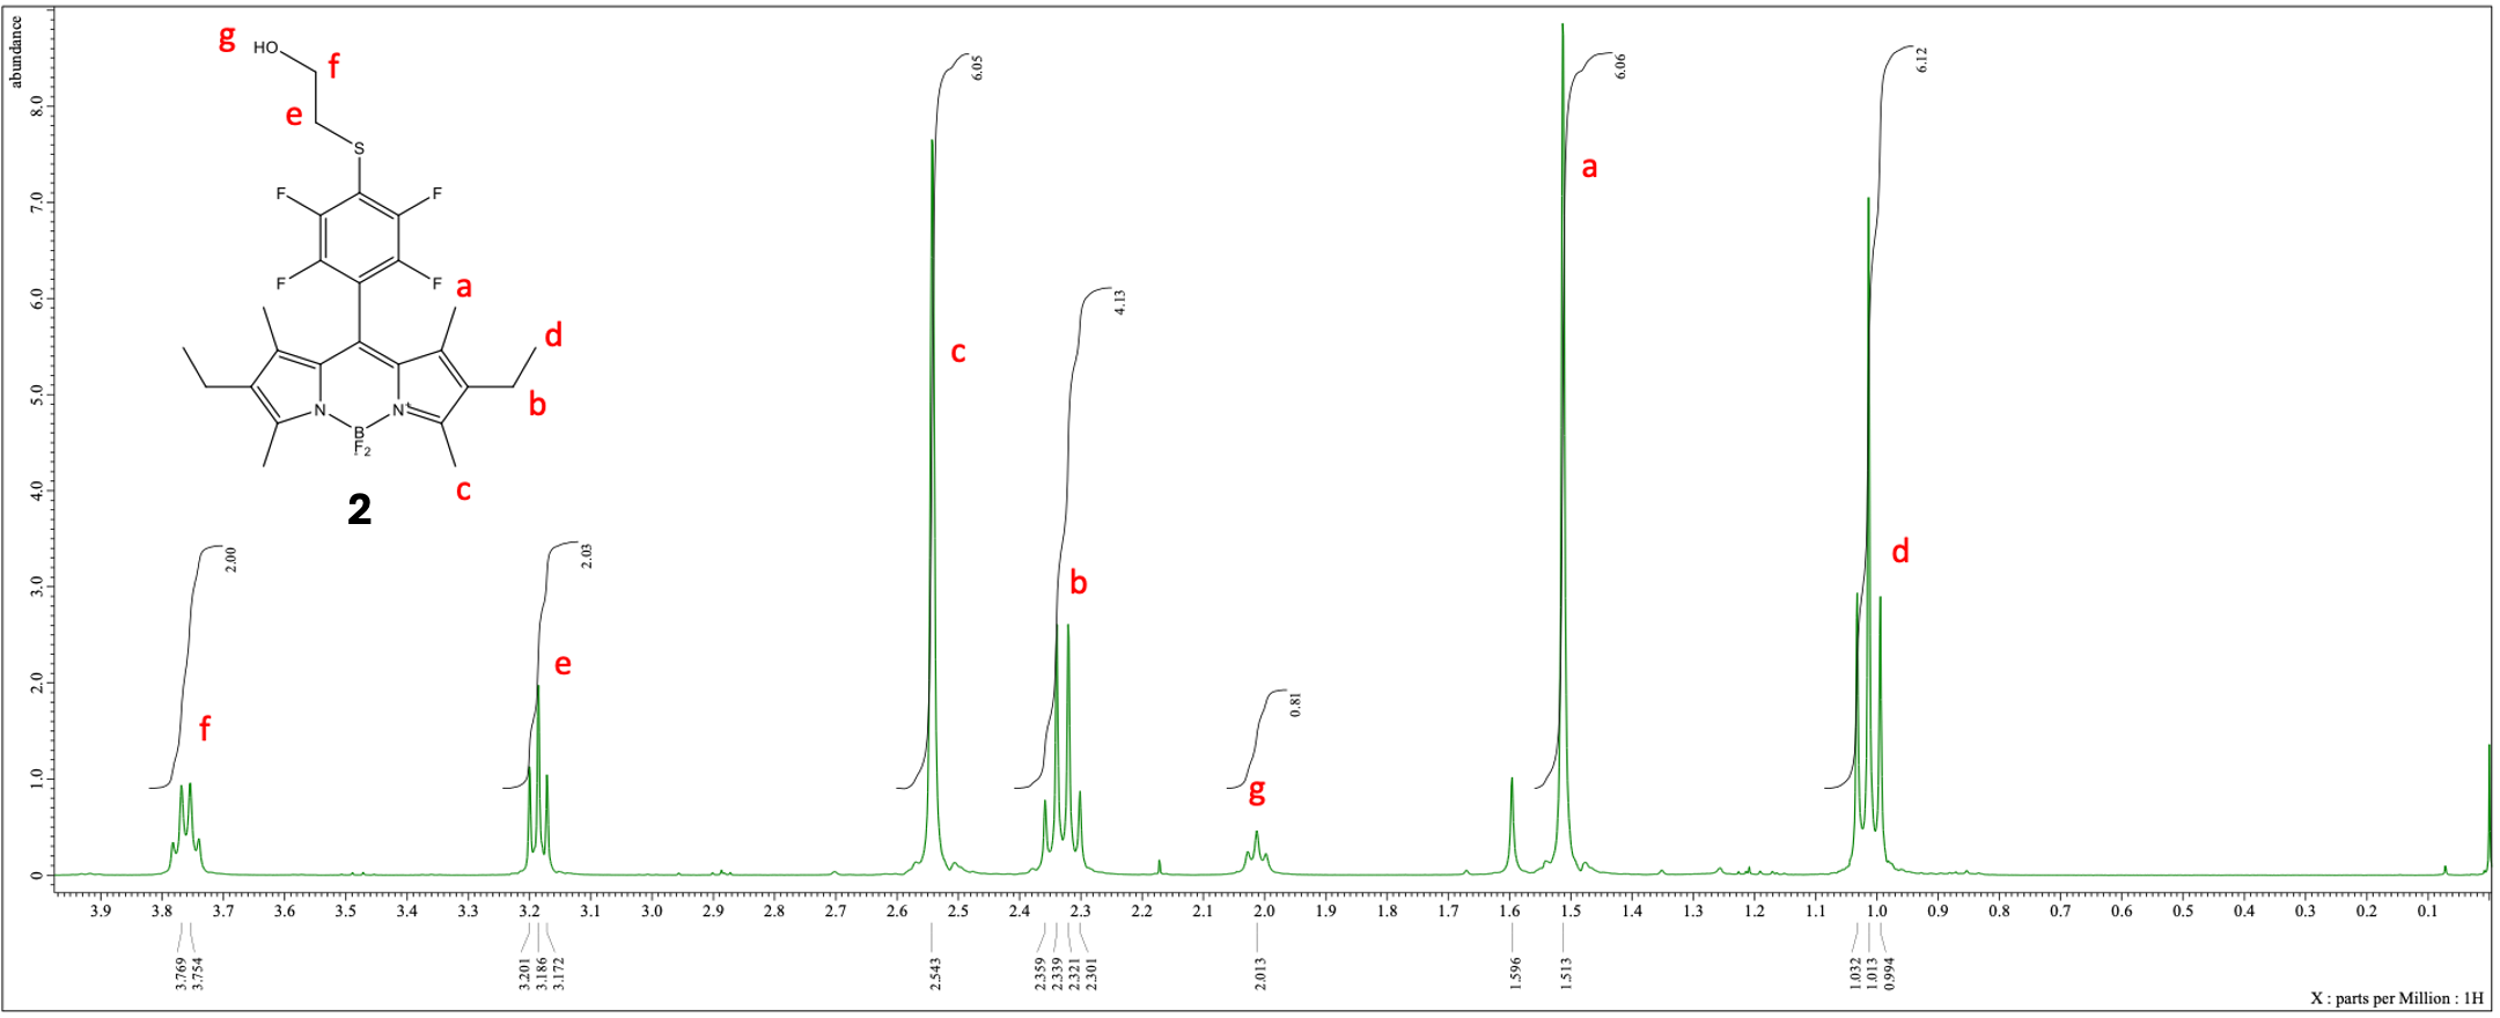


**Fig. S2 Bodipy (2)** 1H-NMR (400 MHz, CHLOROFORM-D) δ 3.76 (d, J = 6.0 Hz, 2H), 3.19 (t, J = 5.7 Hz, 2H), 2.54 (s, 6H), 2.33 (q, J = 7.6 Hz, 4H), 2.01 (t, 1H), 1.51 (s, 6H), 1.01 (t, J = 7.6 Hz, 6H)


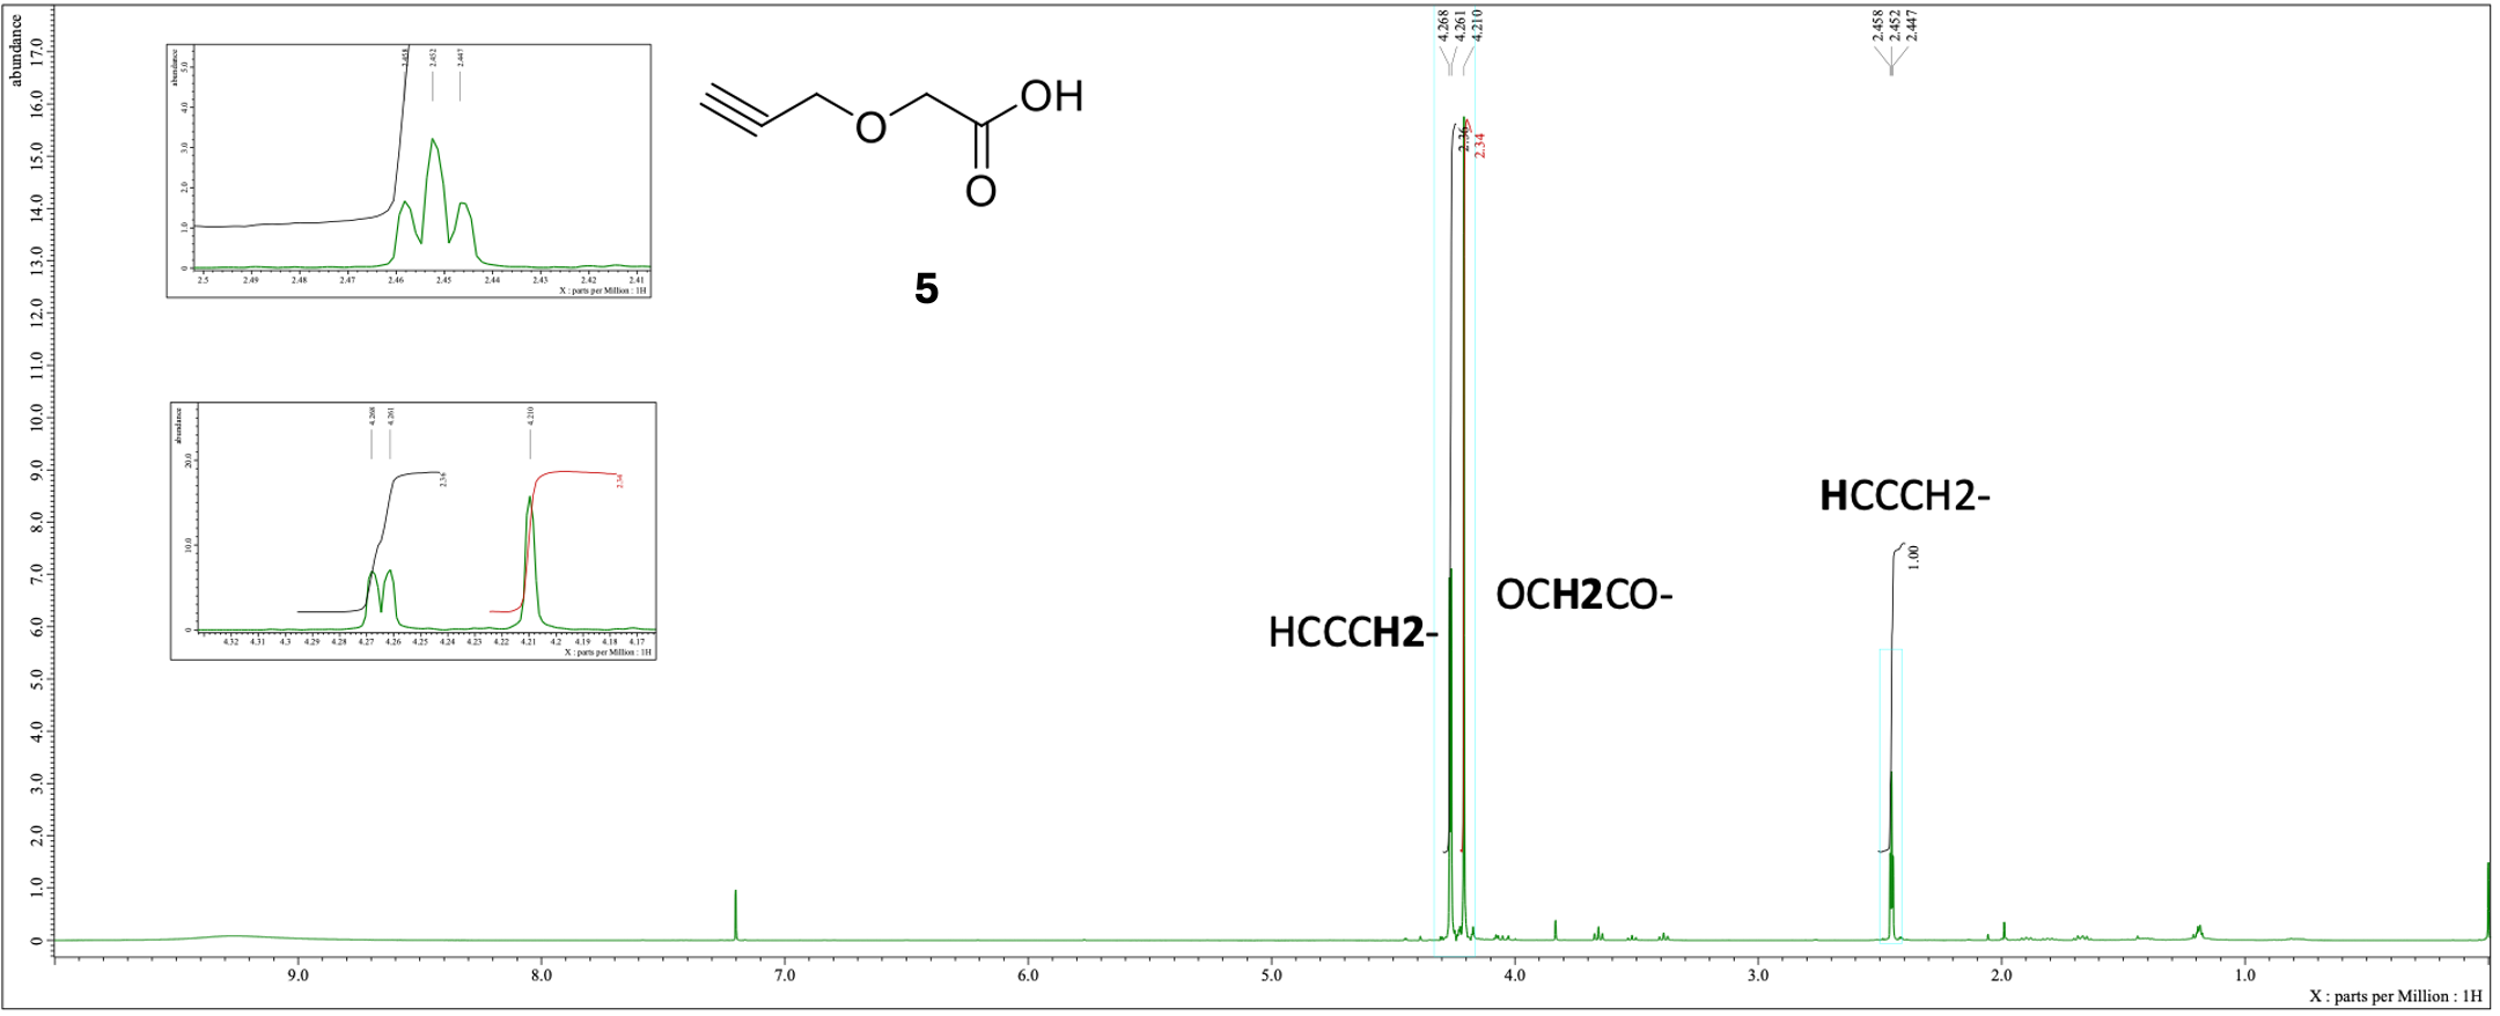


**Fig. S3 (Propargyloxy)acetic acid (5)** 1H-NMR (400 MHz, CHLOROFORM-D) δ 4.26 (d, J = 2.7 Hz, 2H), 4.21 (s, 2H), 2.45 (t, J = 2.3 Hz, 1H)


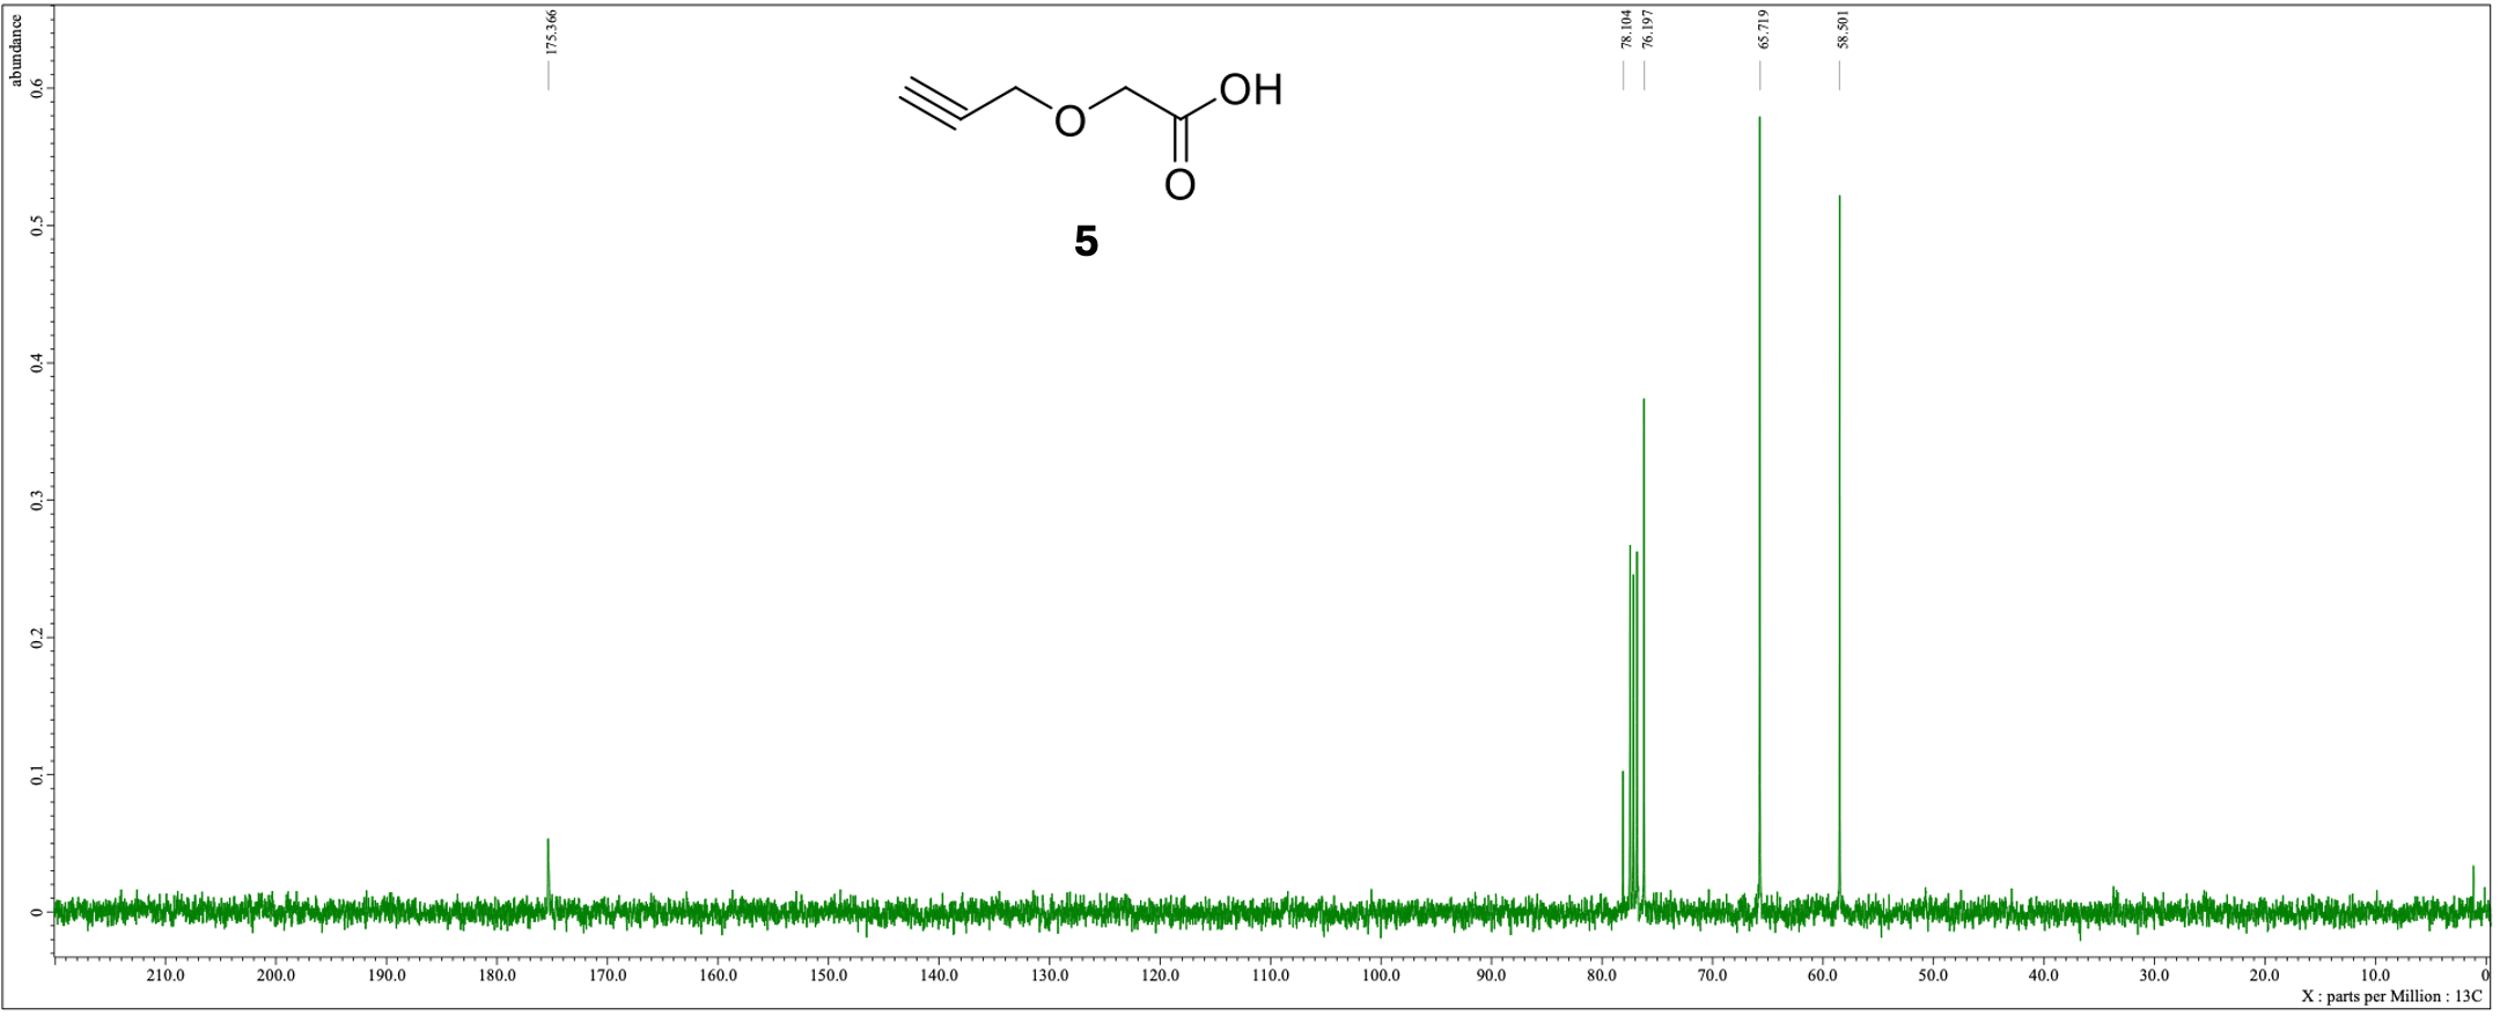


**Fig. S4 (Propargyloxy)acetic acid (5)** 13C-NMR (101 MHz, CHLOROFORM-D) δ 175.4, 78.1, 76.2, 65.7, 58.5


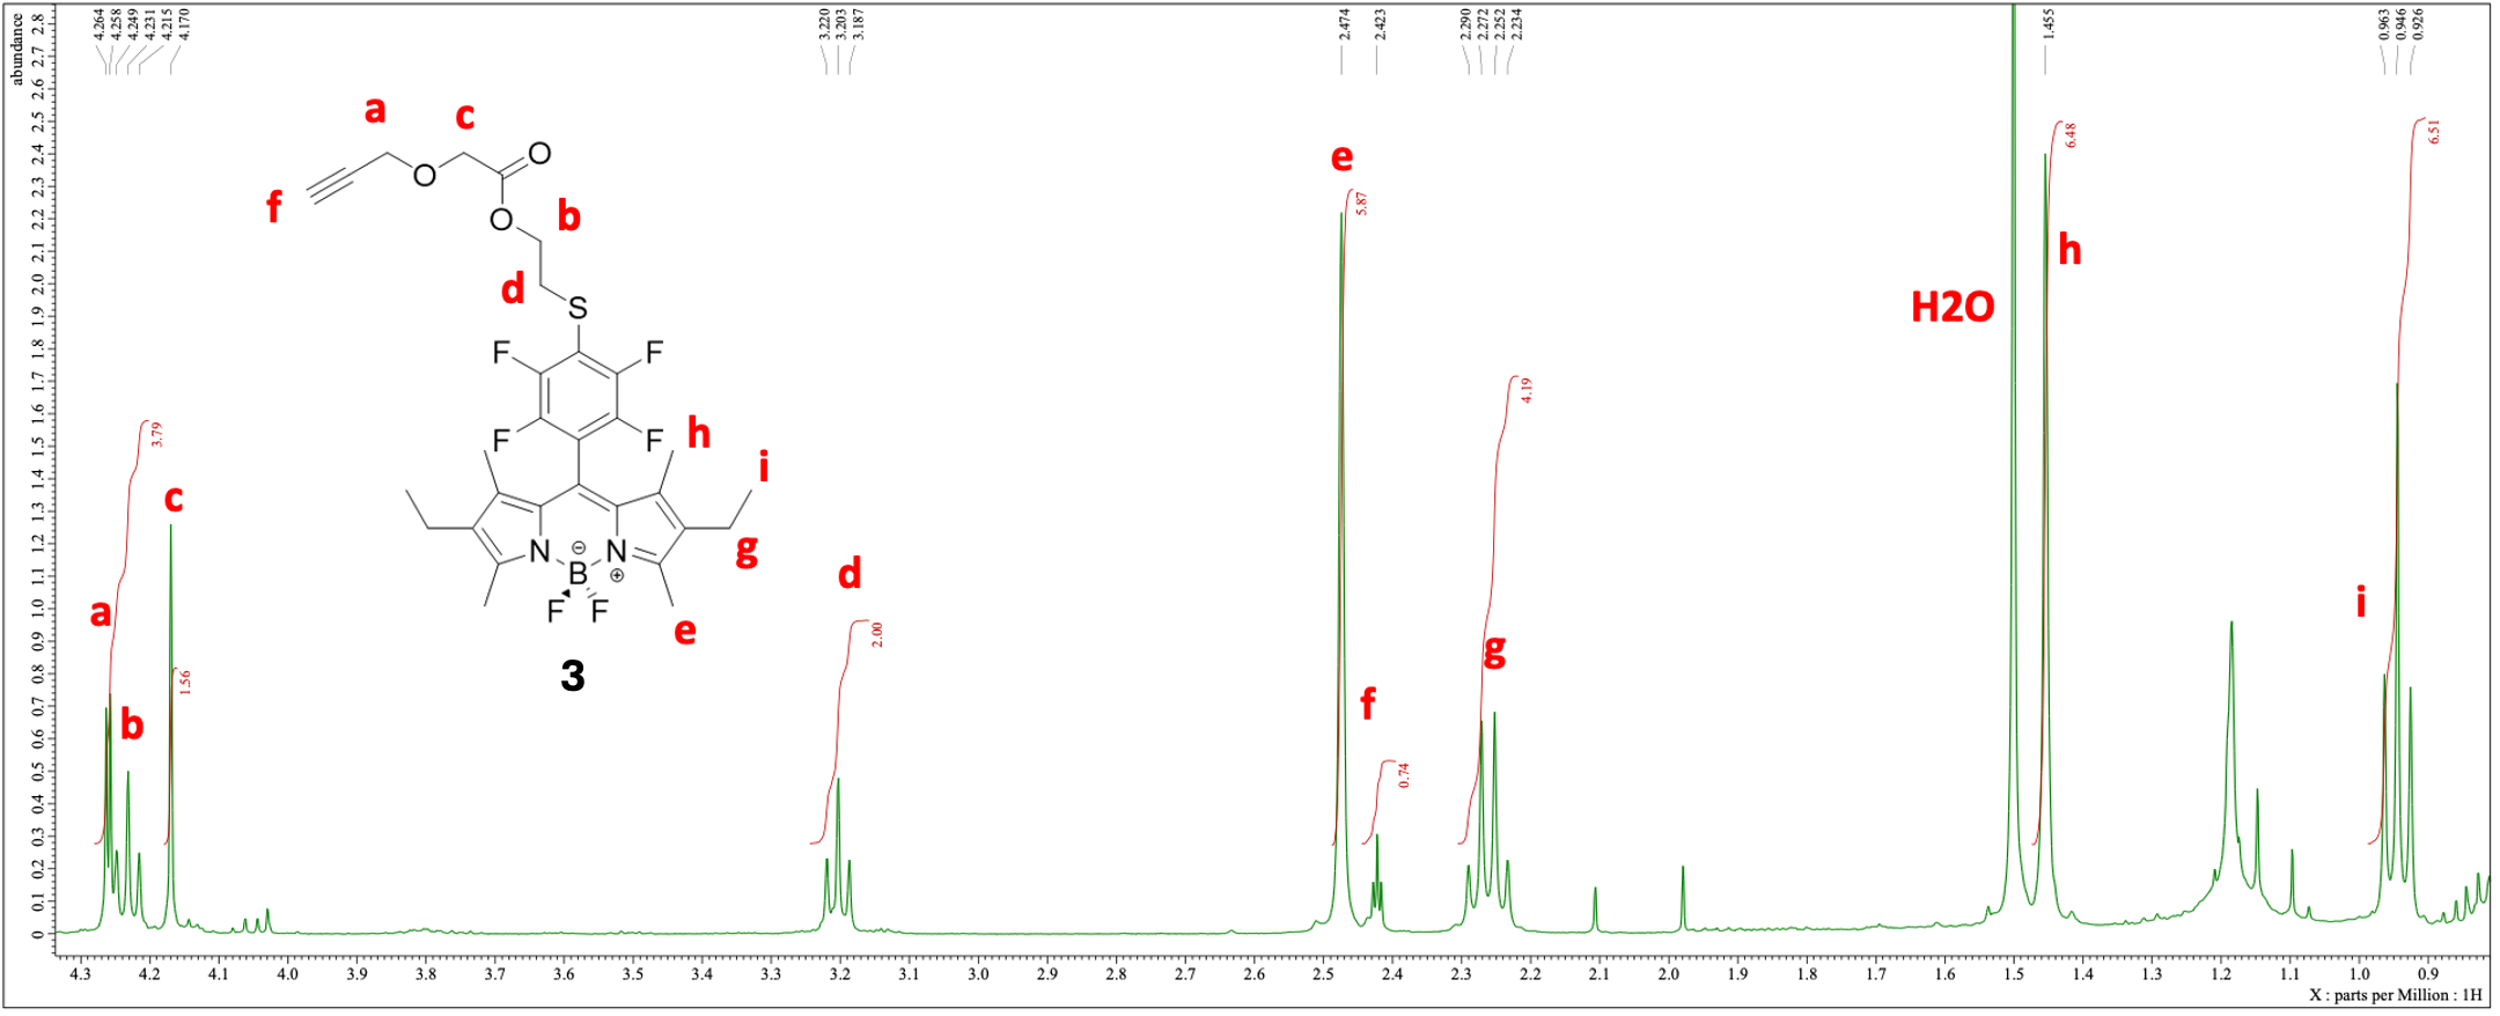


**Fig. S5 Bodipy (3)** 1H-NMR (400 MHz, CHLOROFORM-D) δ 4.26-4.22 (d+t overlapping signals, 4H), 4.17 (s, 2H), 3.20 (t, J = 6.6 Hz, 2H), 2.47 (s, 6H), 2.42 (t, 1H), 2.26 (q, J = 7.5 Hz, 4H), 1.45 (s, 6H), 0.94 (t, J = 7.6 Hz, 7H)


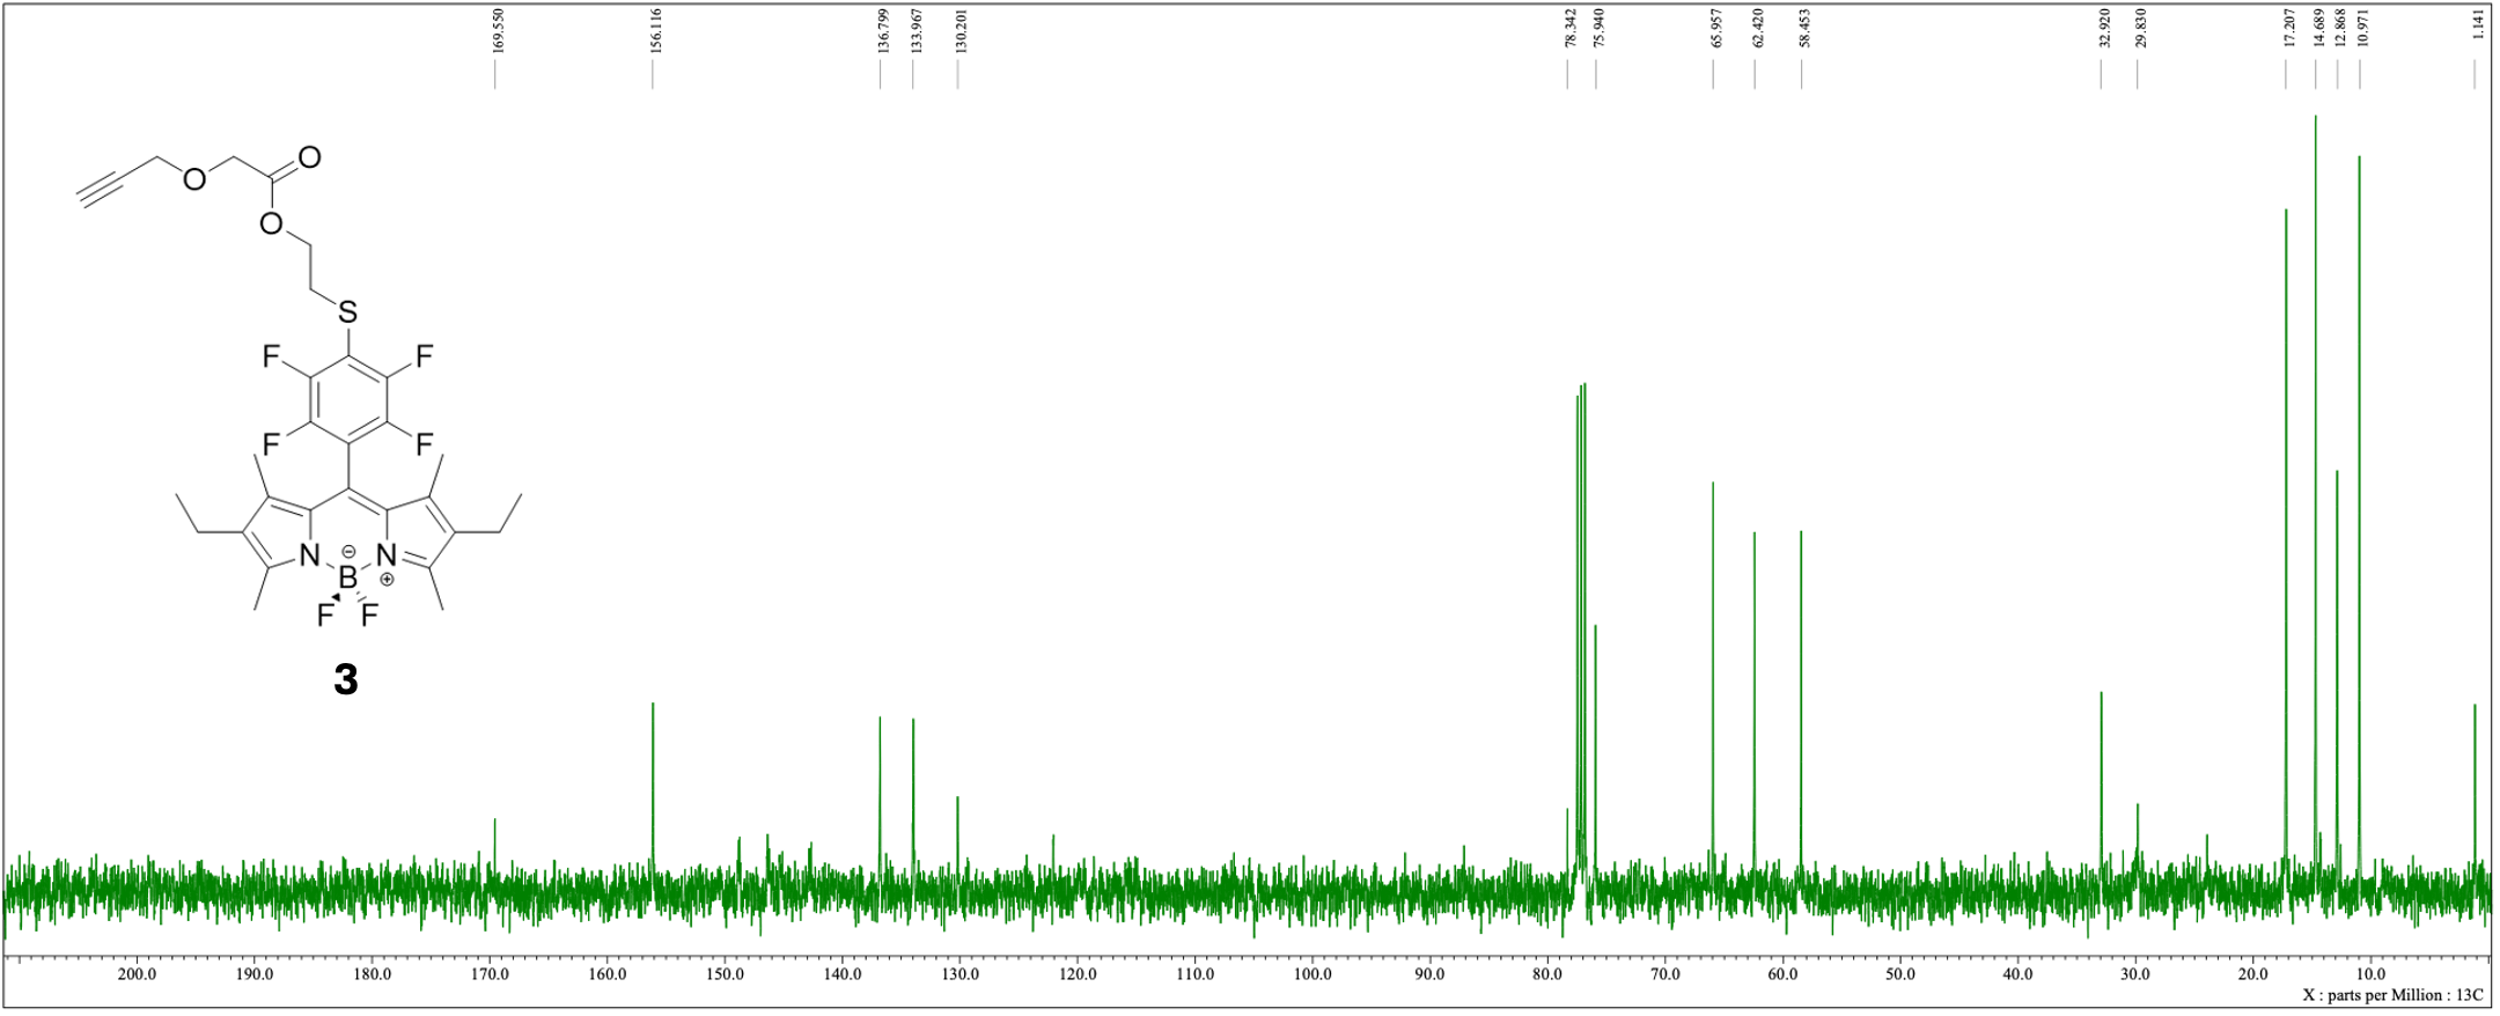


**Fig. S6 Bodipy (3)** 13C-NMR (101 MHz, CHLOROFORM-D) δ 169.6, 156.1, 136.8, 134.0, 130.2, 78.3, 75.9, 66.0, 62.4, 58.5, 32.9, 29.8, 17.2, 14.7, 12.9, 11.0, 1.1


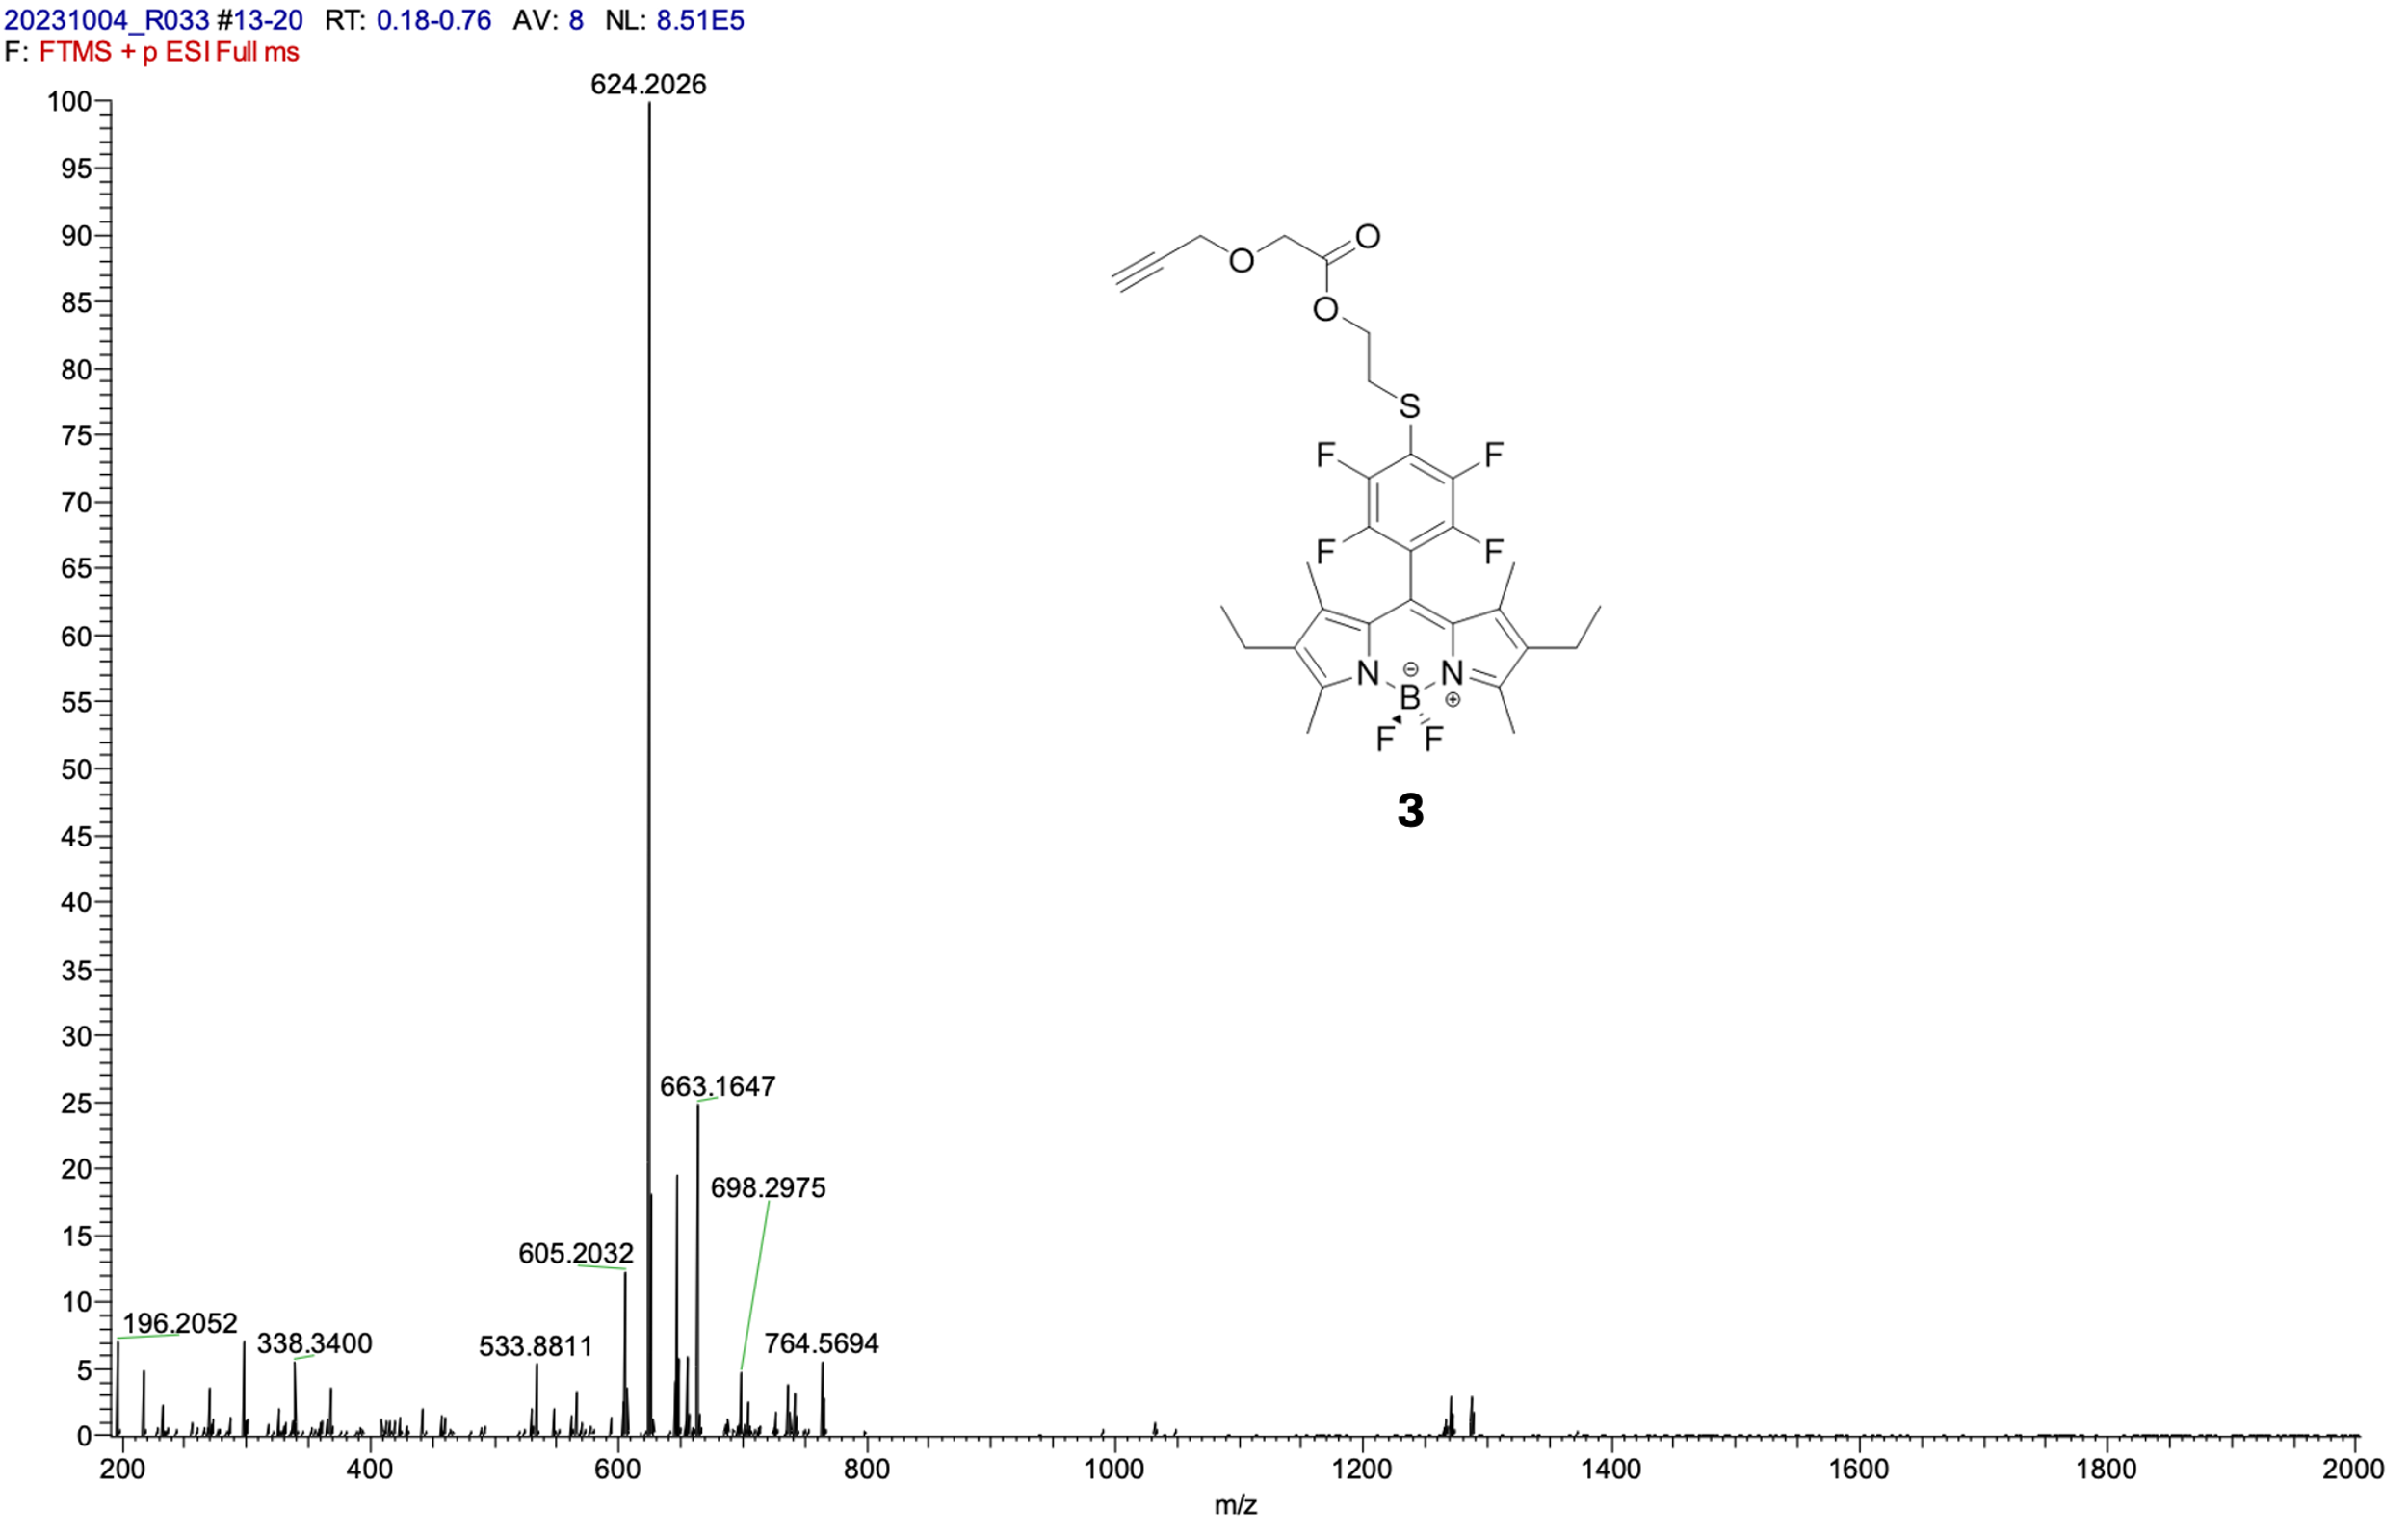


**Fig. S7 Bodipy (3)** Mass spectrum acquired by direct infusion using an LTQ-Orbitrap Velos Pro (ThermoFisher). Sample analyzed in acetonitrile (ACN) under positive ESI mode (ESI+), using FTMS;


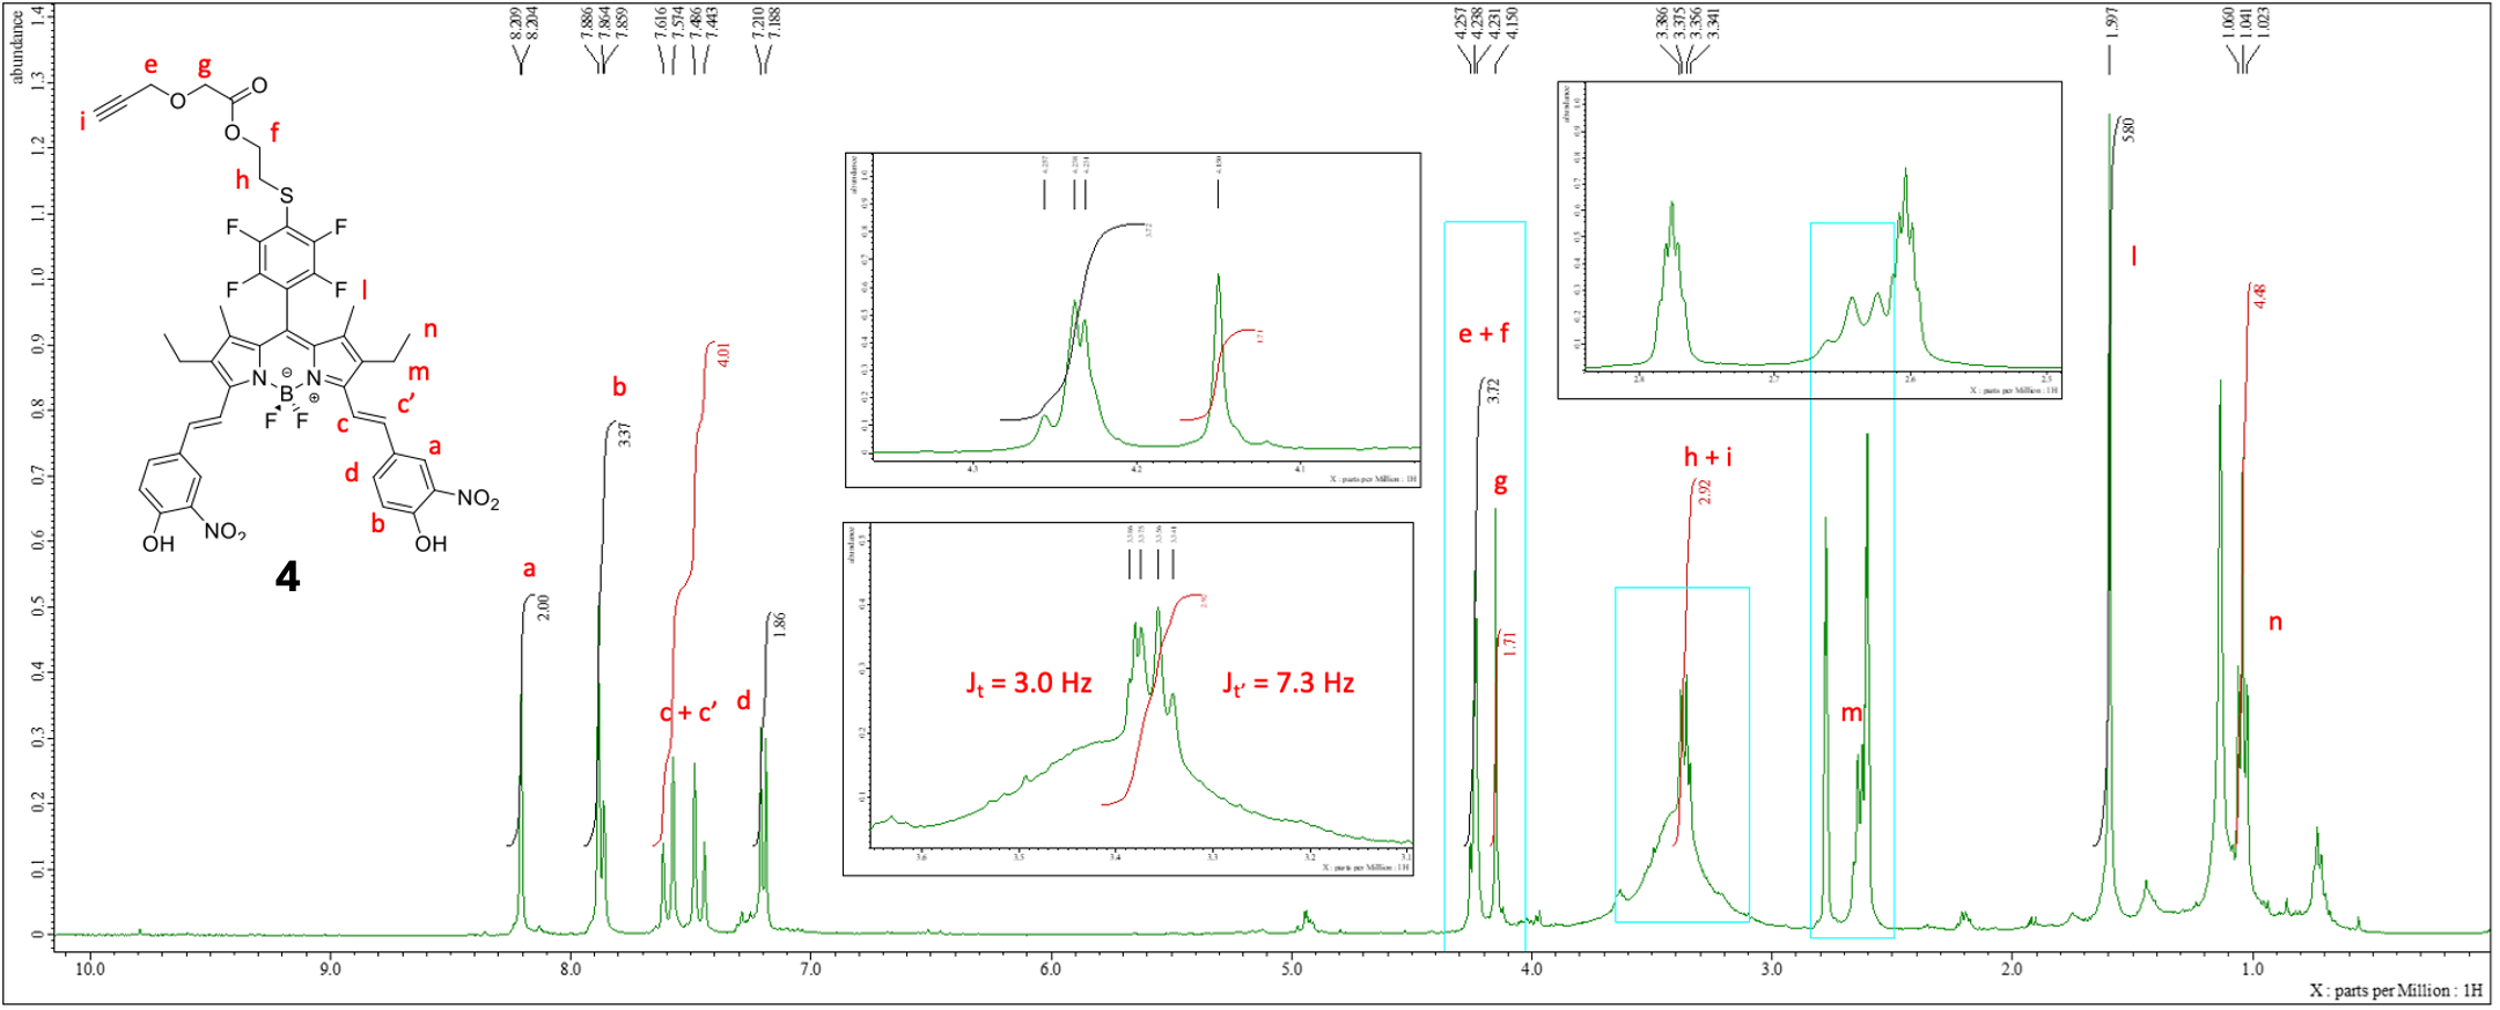


**Fig. S8 Bodipy (4)** 1H-NMR (400 MHz, DMF-D7) δ 8.21 (d, J = 1.8 Hz, 2H), 7.87 (t, J = 5.3 Hz, 3H), 7.53 (dd, 4H), 7.20 (d, J = 8.7 Hz, 2H), 4.24 (d+t overlapping, Jd = 3.0 Hz, 4H), 4.15 (s, 2H), 3.36 (t + t overlapping, Jt = 3.0 Hz, Jt’ = 7.3 Hz, 3H), 1.60 (s, 6H), 1.04 (t, J = 7.3 Hz, 4H) (-**CH2**CH3 covered by DMF-D7 quintet)


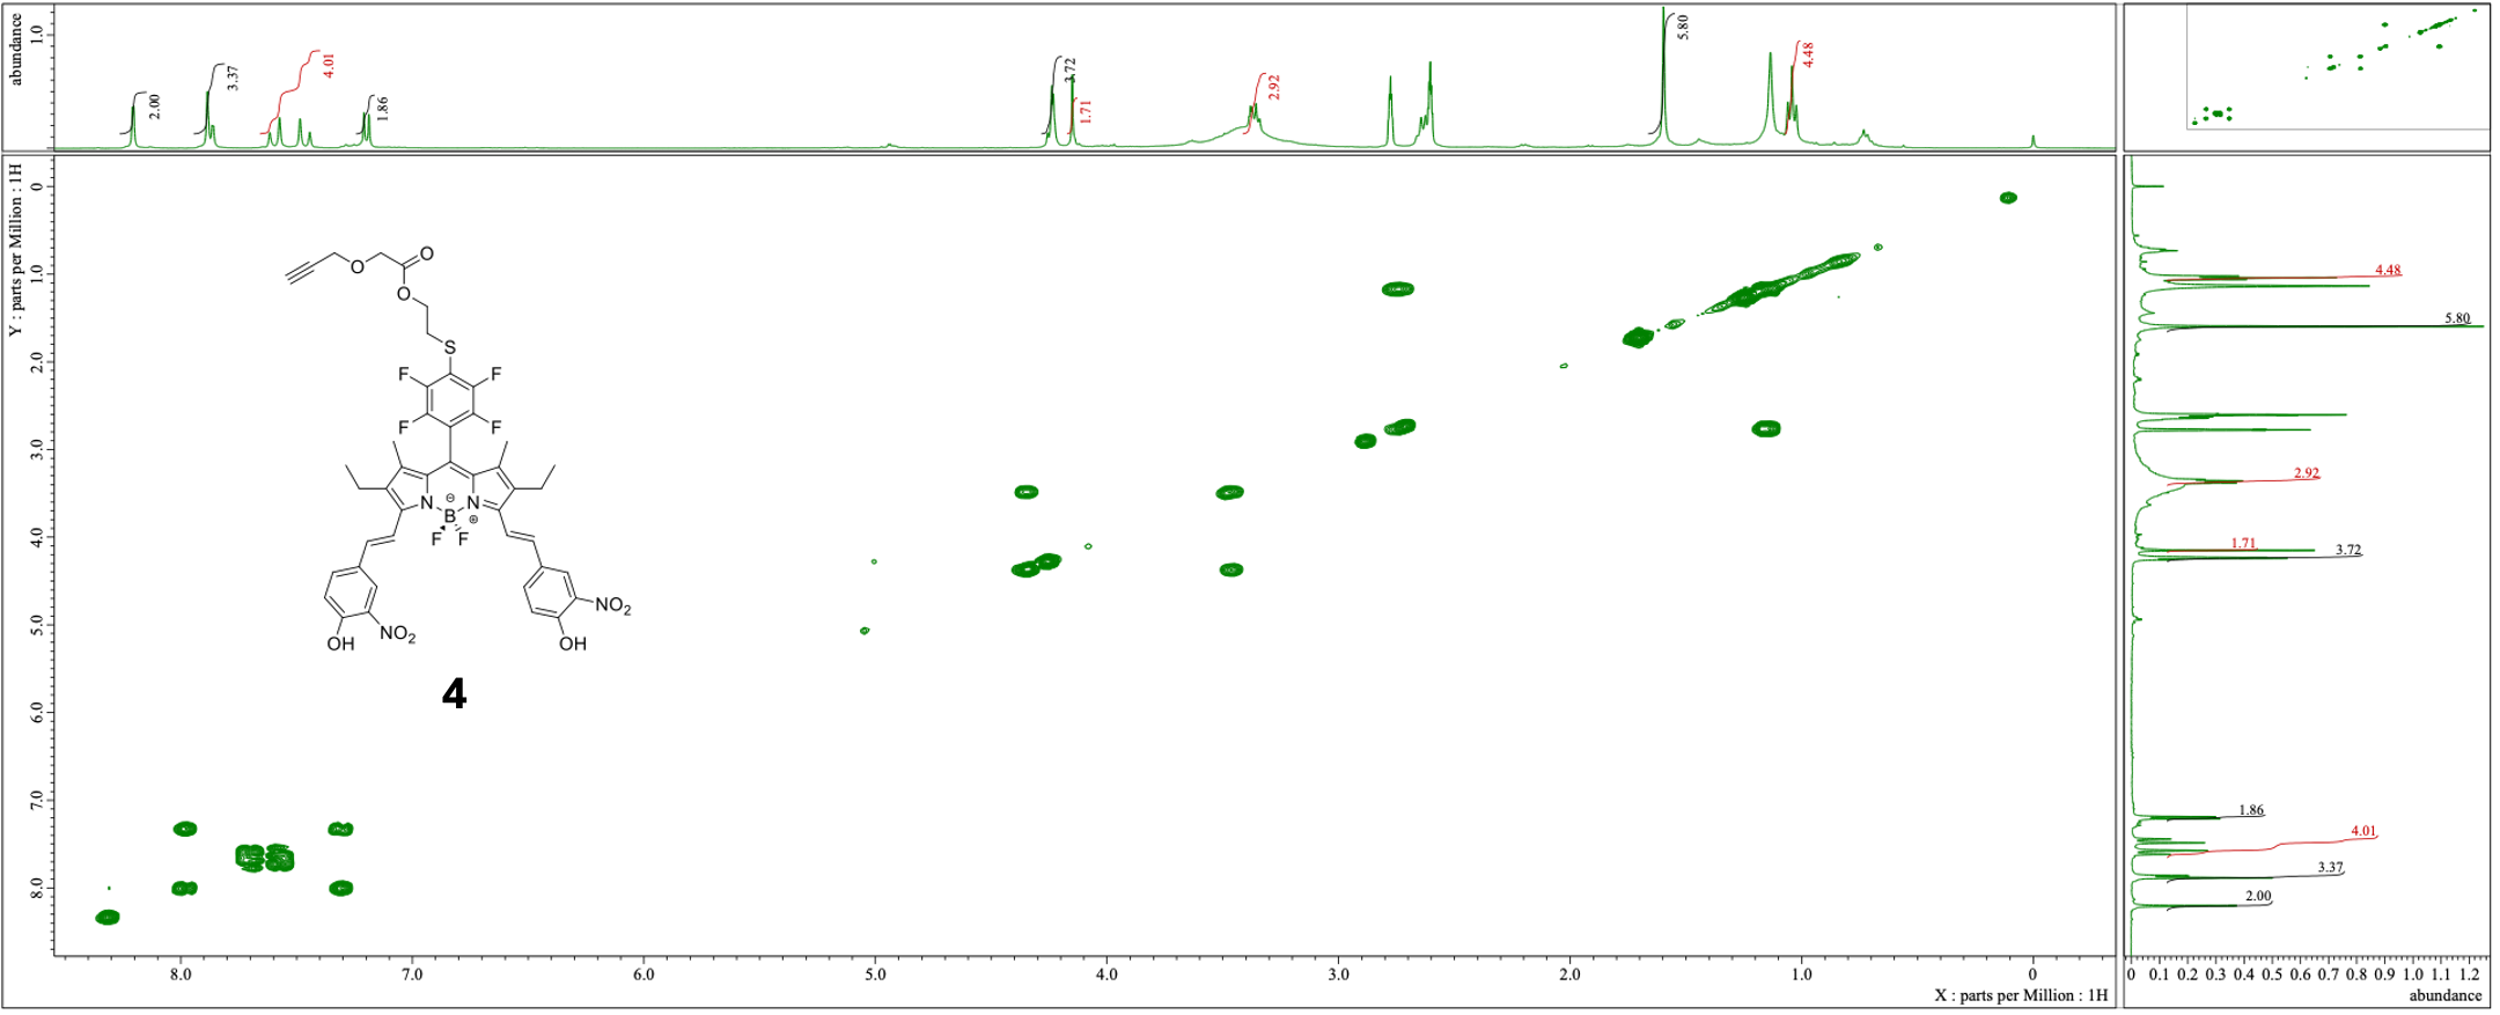


**Fig. S9 Bodipy (4)** COSY-NMR


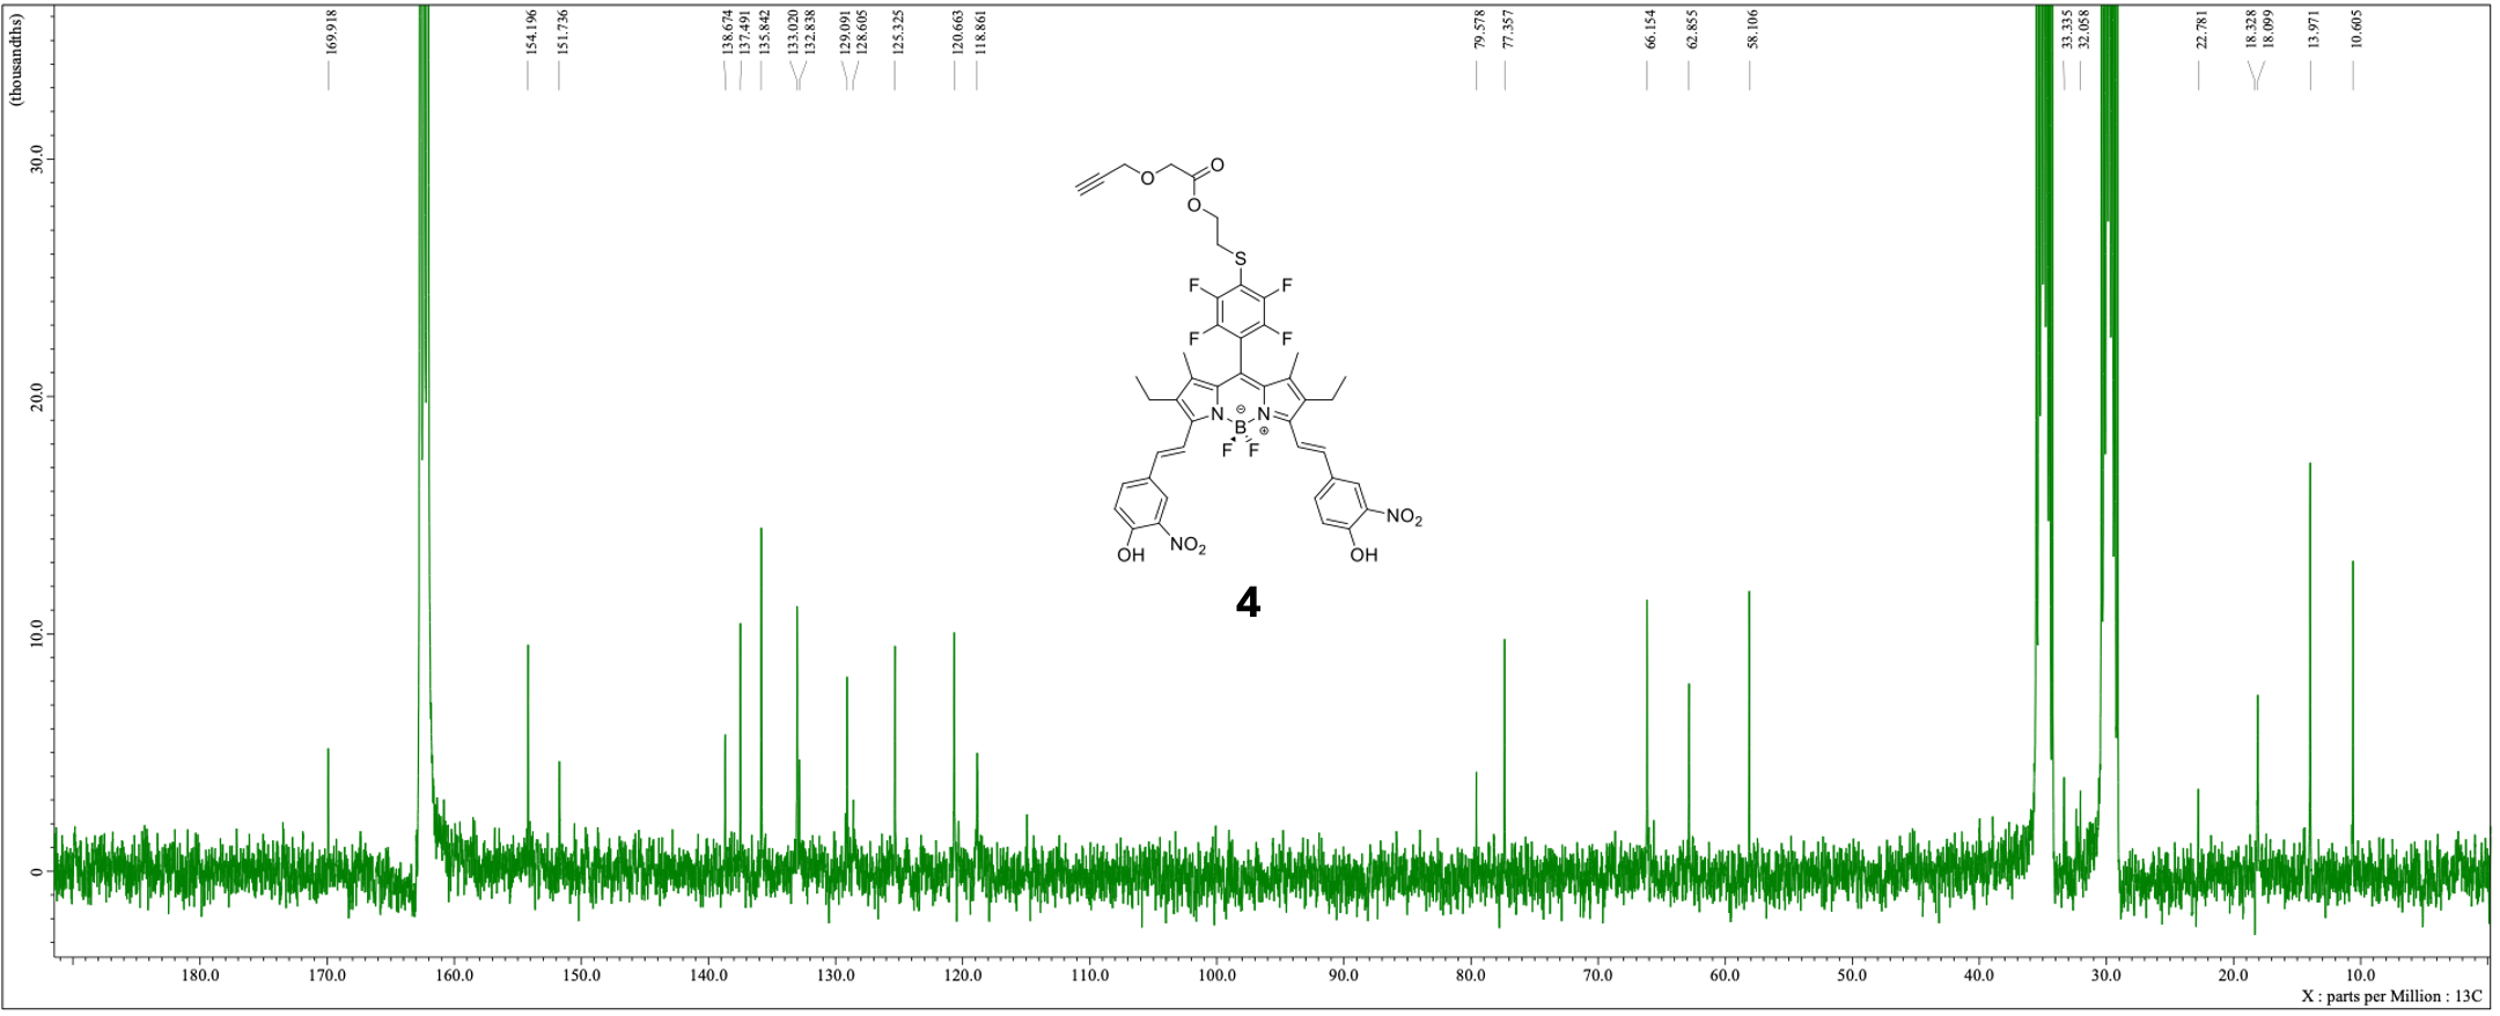


**Fig. S10 Bodipy (4)** 13C-NMR (101 MHz, DMF-D7) δ 169.9, 154.2, 151.7, 138.7, 137.5, 135.8, 133.0, 132.8, 129.1, 128.6, 125.3, 120.7, 118.9, 79.6, 77.4, 66.2, 62.9, 58.1, 33.3, 32.1, 22.8, 18.3, 18.1, 14.0, 10.6


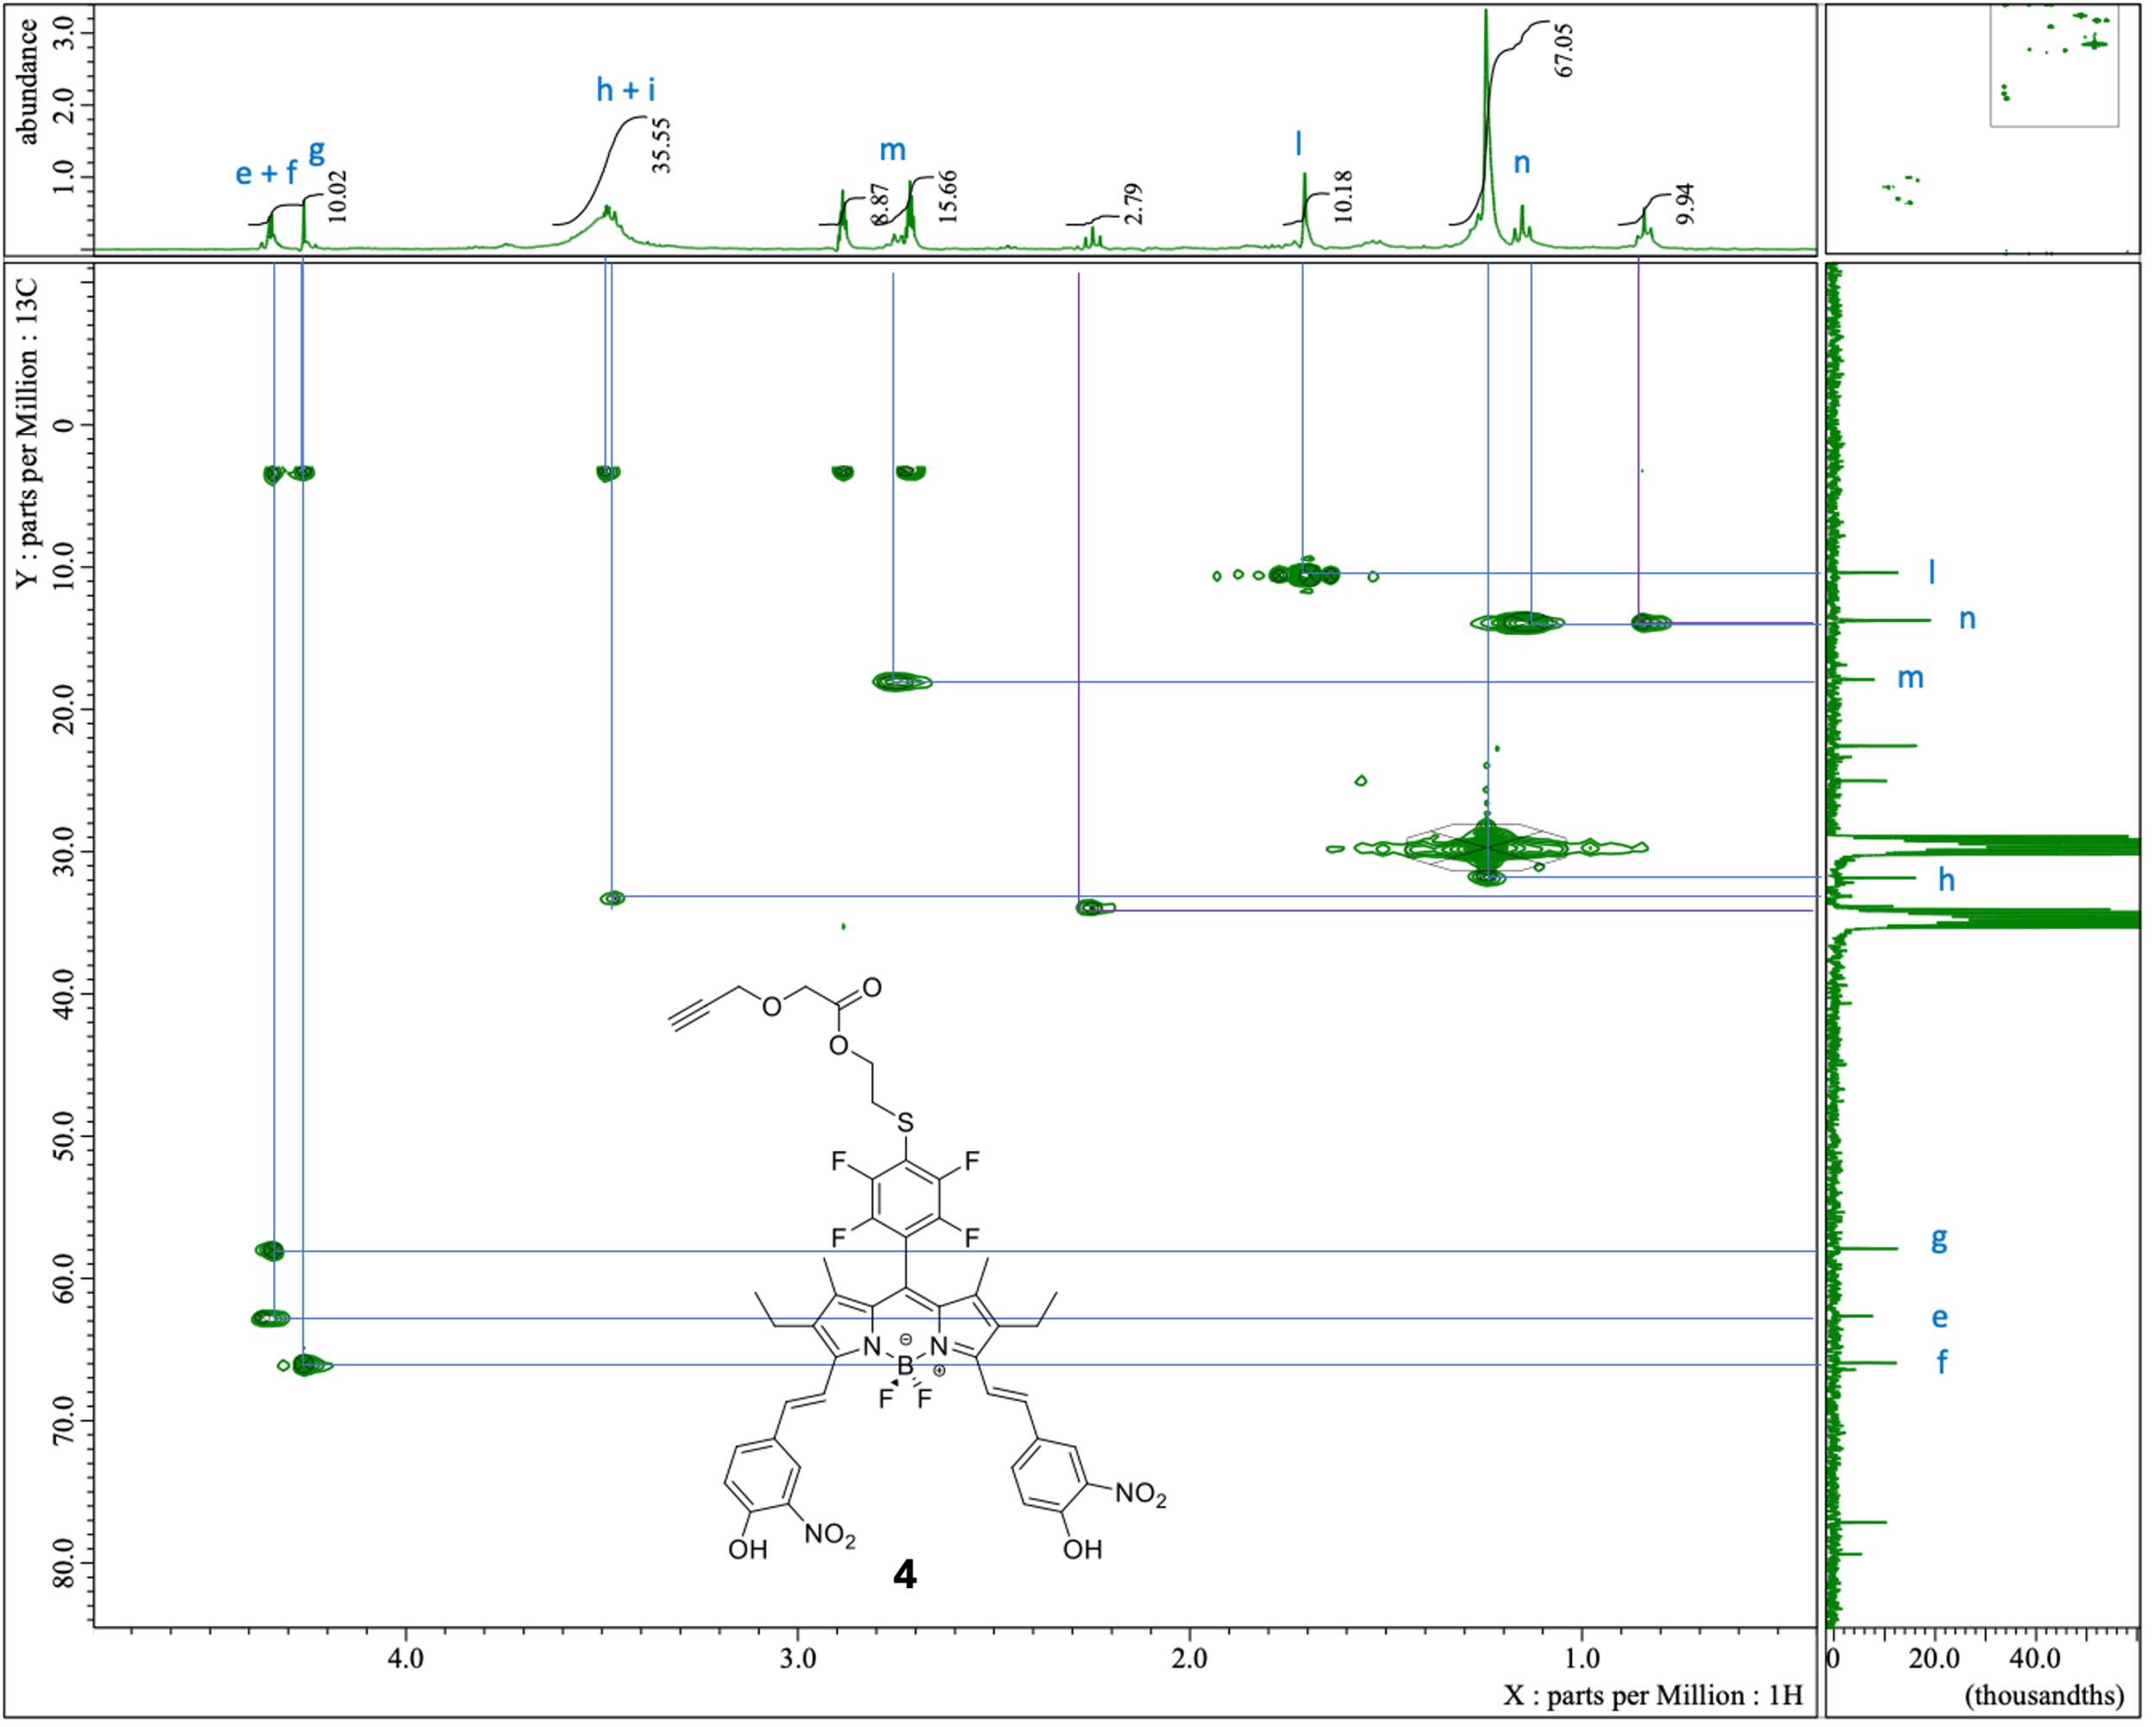


**Fig. S11 Bodipy (4)** HMQC DMF-d7 range 0.0 - 5-0 ppm


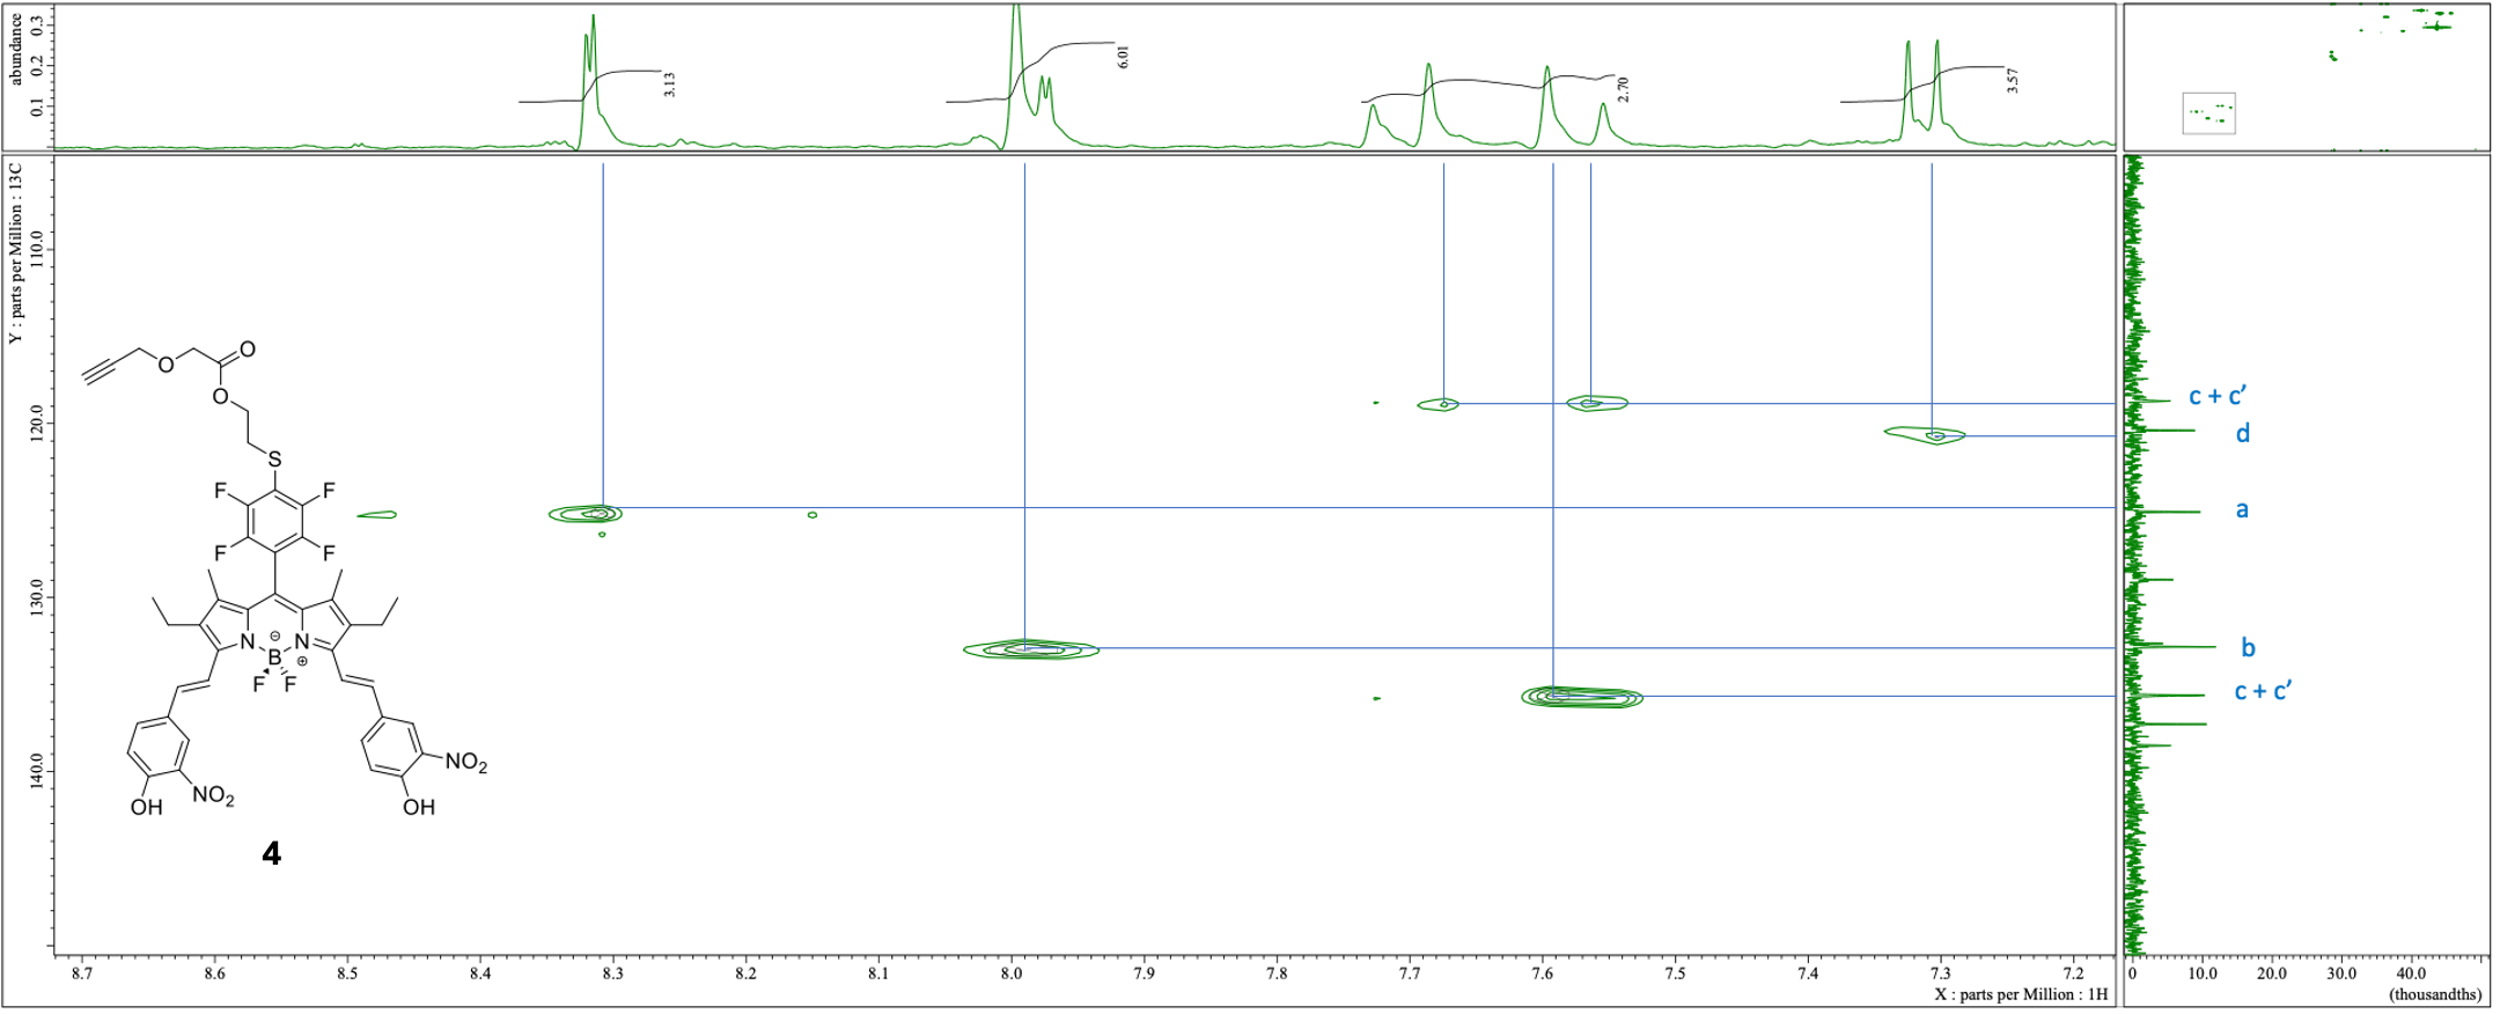


**Fig. S12 Bodipy (4)** HMQC DMF-d7 range 7.1 - 8.7


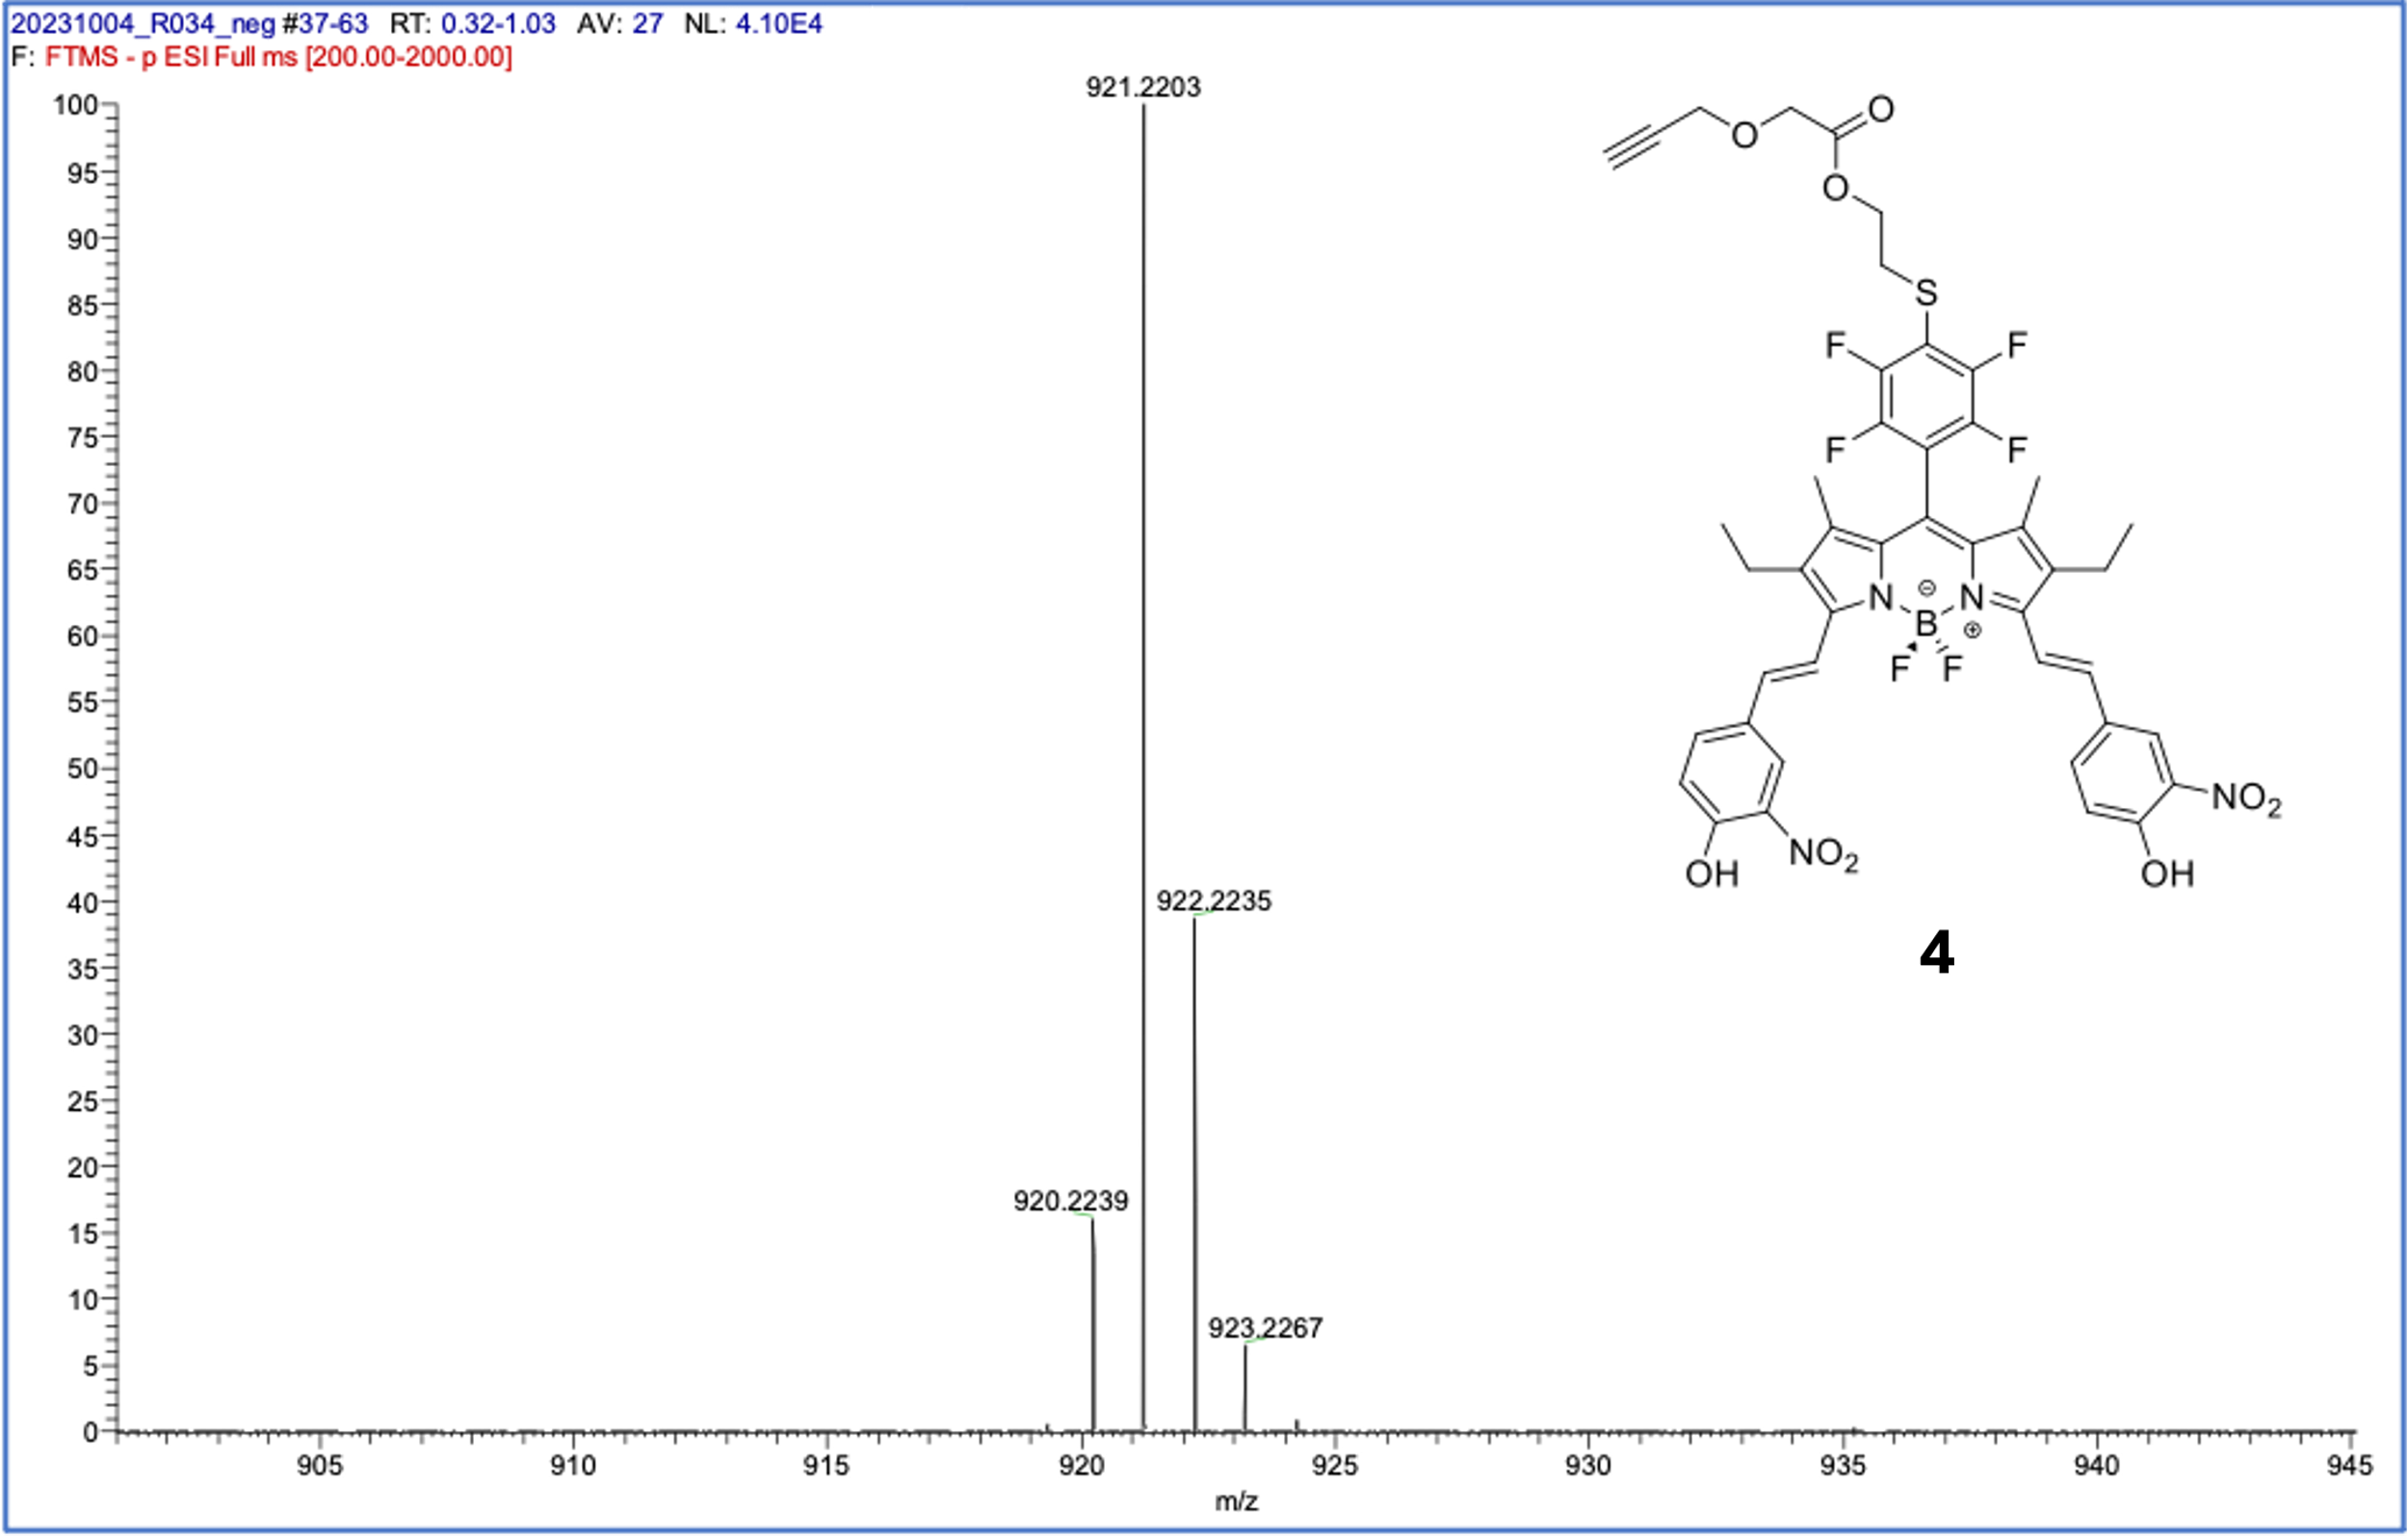


**Fig. S13 Bodipy (4)** Mass spectrum acquired by direct infusion using an LTQ-Orbitrap Velos Pro (ThermoFisher). Sample analyzed in an acetonitrile and tetrahydrofuran solution (ACN/THF) under ESI mode (ESI+/-);

# DFT

- 1. Molecular orbitals

**Fig. S14** Frontiers molecular orbitals of BODIPY **4** (isovalue 0.02)

- 1. Cartesian coordinates of the calculated structures

**4-H2**

Total energy E=-2820.9653 Hartree

Imaginary Frequency: 0

| Tag | Symbol | X | Y | Z |
| --- | --- | --- | --- | --- |
| 1 | C | -2.775081 | 2.570953 | -0.294079 |
| 2 | C | -1.64926 | 3.38662 | -0.380311 |
| 3 | C | -0.500507 | 2.534751 | -0.282496 |
| 4 | N | -0.918897 | 1.243401 | -0.152072 |
| 5 | C | -2.306436 | 1.219548 | -0.142508 |
| 6 | C | -2.30639 | -1.219591 | 0.142472 |
| 7 | C | -2.774983 | -2.571013 | 0.294055 |
| 8 | N | -0.918849 | -1.243396 | 0.151988 |
| 9 | C | -1.64913 | -3.386641 | 0.380245 |
| 10 | C | -0.50041 | -2.534731 | 0.282395 |
| 11 | C | -2.99208 | -0.000033 | -0.000006 |
| 12 | B | 0.001073 | 0.000019 | -0.000054 |
| 13 | F | 0.816495 | -0.142125 | -1.136677 |
| 14 | F | 0.81652 | 0.142191 | 1.136545 |
| 15 | C | -4.195376 | -3.05623 | 0.360487 |
| 16 | H | -4.773593 | -2.548903 | 1.139881 |
| 17 | H | -4.723501 | -2.910796 | -0.58937 |
| 18 | H | -4.224774 | -4.126403 | 0.580182 |
| 19 | C | -4.195493 | 3.056122 | -0.360462 |
| 20 | H | -4.773719 | 2.548778 | -1.139839 |
| 21 | H | -4.723581 | 2.910667 | 0.589411 |
| 22 | H | -4.224934 | 4.126295 | -0.580154 |
| 23 | C | -1.652155 | -4.878671 | 0.587584 |
| 24 | H | -2.506863 | -5.152503 | 1.217976 |
| 25 | H | -0.766059 | -5.171487 | 1.16144 |
| 26 | C | -1.724834 | -5.695053 | -0.7186 |
| 27 | H | -1.702667 | -6.770458 | -0.505364 |
| 28 | H | -2.649472 | -5.476737 | -1.264963 |
| 29 | H | -0.890243 | -5.462967 | -1.3902 |
| 30 | C | -1.652343 | 4.87865 | -0.587652 |
| 31 | H | -2.507079 | 5.15245 | -1.218018 |
| 32 | H | -0.766274 | 5.171495 | -1.161536 |
| 33 | C | -1.725008 | 5.695031 | 0.718533 |
| 34 | H | -1.702882 | 6.770437 | 0.505294 |
| 35 | H | -2.649622 | 5.476686 | 1.264925 |
| 36 | H | -0.890389 | 5.462972 | 1.390107 |
| 37 | C | 0.911917 | 2.831675 | -0.348869 |
| 38 | C | 1.505234 | 4.037476 | -0.163456 |
| 39 | H | 1.537566 | 1.969449 | -0.548621 |
| 40 | H | 0.905392 | 4.901283 | 0.103745 |
| 41 | C | 0.912027 | -2.831601 | 0.348721 |
| 42 | C | 1.505386 | -4.037376 | 0.163268 |
| 43 | H | 1.537645 | -1.969356 | 0.548484 |
| 44 | H | 0.90556 | -4.90121 | -0.103881 |
| 45 | C | 2.93973 | 4.30403 | -0.248326 |
| 46 | C | 3.4094 | 5.584011 | 0.048812 |
| 47 | C | 3.902713 | 3.32735 | -0.622219 |
| 48 | C | 4.775889 | 5.892283 | -0.013916 |
| 49 | H | 2.723718 | 6.372535 | 0.338294 |
| 50 | C | 5.249536 | 3.621672 | -0.686238 |
| 51 | H | 3.581582 | 2.320526 | -0.869933 |
| 52 | C | 5.729759 | 4.911972 | -0.383318 |
| 53 | C | 2.93989 | -4.303891 | 0.248114 |
| 54 | C | 3.902877 | -3.327139 | 0.621807 |
| 55 | C | 3.40956 | -5.583927 | -0.048787 |
| 56 | C | 5.249698 | -3.621457 | 0.685896 |
| 57 | H | 3.581764 | -2.320232 | 0.86921 |
| 58 | C | 4.776041 | -5.892206 | 0.01405 |
| 59 | H | 2.72388 | -6.372492 | -0.338168 |
| 60 | C | 5.729918 | -4.911817 | 0.383225 |
| 61 | C | -4.486836 | -0.000058 | 0.00002 |
| 62 | C | -5.218453 | 0.216571 | 1.170589 |
| 63 | C | -5.218487 | -0.216712 | -1.170523 |
| 64 | C | -6.611322 | 0.218692 | 1.185535 |
| 65 | F | -4.575745 | 0.4331 | 2.330839 |
| 66 | C | -6.611356 | -0.21888 | -1.18542 |
| 67 | F | -4.575813 | -0.433219 | -2.330795 |
| 68 | C | -7.310597 | -0.000105 | 0.00007 |
| 69 | F | -7.280681 | 0.430669 | 2.326724 |
| 70 | F | -7.280748 | -0.430877 | -2.326586 |
| 71 | F | -8.647416 | -0.000127 | 0.000093 |
| 72 | H | 5.977499 | 2.869912 | -0.974447 |
| 73 | O | 7.047971 | 5.121399 | -0.468136 |
| 74 | H | 7.214414 | 6.06521 | -0.227447 |
| 75 | N | 5.185165 | 7.242993 | 0.308443 |
| 76 | O | 6.407782 | 7.517844 | 0.255405 |
| 77 | O | 4.334552 | 8.070907 | 0.620506 |
| 78 | H | 5.977654 | -2.86967 | 0.974051 |
| 79 | N | 5.185303 | -7.242978 | -0.308093 |
| 80 | O | 6.40788 | -7.517941 | -0.25468 |
| 81 | O | 4.334704 | -8.070861 | -0.620288 |
| 82 | O | 7.048143 | -5.121195 | 0.467976 |
| 83 | H | 7.214567 | -6.065101 | 0.227652 |

**4-H-**

Total energy E=-2820.4557 Hartree

Imaginary Frequency: 0

| Tag | Symbol | X | Y | Z |
| --- | --- | --- | --- | --- |
| 1 | C | -2.840263 | 2.440189 | -0.20402 |
| 2 | C | -1.763451 | 3.299737 | -0.255724 |
| 3 | C | -0.552536 | 2.495608 | -0.166665 |
| 4 | N | -0.931155 | 1.176982 | -0.074995 |
| 5 | C | -2.316931 | 1.090689 | -0.083831 |
| 6 | C | -2.214214 | -1.356483 | 0.1108 |
| 7 | C | -2.628042 | -2.717081 | 0.214913 |
| 8 | N | -0.835966 | -1.319542 | 0.118949 |
| 9 | C | -1.460831 | -3.495559 | 0.27454 |
| 10 | C | -0.354696 | -2.606982 | 0.206433 |
| 11 | C | -2.957864 | -0.140268 | 0.00817 |
| 12 | B | 0.030167 | -0.034766 | 0.033885 |
| 13 | F | 0.873301 | -0.095708 | -1.093937 |
| 14 | F | 0.832353 | 0.081335 | 1.190198 |
| 15 | C | -4.027991 | -3.267402 | 0.259671 |
| 16 | H | -4.640762 | -2.803176 | 1.040676 |
| 17 | H | -4.558763 | -3.139328 | -0.692612 |
| 18 | H | -4.009428 | -4.341559 | 0.466347 |
| 19 | C | -4.284874 | 2.849162 | -0.267467 |
| 20 | H | -4.826573 | 2.338108 | -1.07111 |
| 21 | H | -4.812558 | 2.636602 | 0.670152 |
| 22 | H | -4.375446 | 3.923613 | -0.446835 |
| 23 | C | -1.408153 | -4.992893 | 0.426527 |
| 24 | H | -2.264019 | -5.32826 | 1.026567 |
| 25 | H | -0.521173 | -5.272865 | 1.006501 |
| 26 | C | -1.418167 | -5.762405 | -0.909746 |
| 27 | H | -1.357764 | -6.845268 | -0.739577 |
| 28 | H | -2.337709 | -5.5568 | -1.470428 |
| 29 | H | -0.57691 | -5.469215 | -1.548221 |
| 30 | C | -1.844886 | 4.796949 | -0.403581 |
| 31 | H | -2.765467 | 5.055046 | -0.940384 |
| 32 | H | -1.032058 | 5.153183 | -1.044735 |
| 33 | C | -1.832754 | 5.560037 | 0.936733 |
| 34 | H | -1.865921 | 6.643316 | 0.766825 |
| 35 | H | -2.700459 | 5.283011 | 1.547054 |
| 36 | H | -0.935507 | 5.335252 | 1.5234 |
| 37 | C | 0.813503 | 2.858054 | -0.186482 |
| 38 | C | 1.350399 | 4.135764 | -0.142779 |
| 39 | H | 1.504645 | 2.025153 | -0.218997 |
| 40 | H | 0.68137 | 4.984371 | -0.051925 |
| 41 | C | 1.068491 | -2.840869 | 0.25427 |
| 42 | C | 1.733655 | -4.014059 | 0.090629 |
| 43 | H | 1.651829 | -1.945051 | 0.433955 |
| 44 | H | 1.189634 | -4.923224 | -0.14415 |
| 45 | C | 2.726004 | 4.484407 | -0.181639 |
| 46 | C | 3.081393 | 5.852558 | -0.094882 |
| 47 | C | 3.805361 | 3.53884 | -0.302881 |
| 48 | C | 4.392511 | 6.283498 | -0.100393 |
| 49 | H | 2.300232 | 6.601828 | -0.005886 |
| 50 | C | 5.104394 | 3.944811 | -0.339167 |
| 51 | H | 3.576601 | 2.478567 | -0.373414 |
| 52 | C | 5.524308 | 5.350277 | -0.258818 |
| 53 | C | 3.183347 | -4.18579 | 0.170238 |
| 54 | C | 4.090826 | -3.123031 | 0.442377 |
| 55 | C | 3.736806 | -5.451069 | -0.030148 |
| 56 | C | 5.455917 | -3.322847 | 0.506502 |
| 57 | H | 3.709712 | -2.119688 | 0.604243 |
| 58 | C | 5.124837 | -5.665483 | 0.035117 |
| 59 | H | 3.101334 | -6.30342 | -0.241919 |
| 60 | C | 6.017029 | -4.598341 | 0.306089 |
| 61 | C | -4.449016 | -0.209695 | 0.001518 |
| 62 | C | -5.200396 | -0.054758 | 1.170809 |
| 63 | C | -5.169498 | -0.453576 | -1.172033 |
| 64 | C | -6.591289 | -0.13131 | 1.180929 |
| 65 | F | -4.582766 | 0.180519 | 2.34138 |
| 66 | C | -6.559947 | -0.534914 | -1.192117 |
| 67 | F | -4.520431 | -0.617091 | -2.337543 |
| 68 | C | -7.274298 | -0.373413 | -0.00796 |
| 69 | F | -7.278943 | 0.026415 | 2.324884 |
| 70 | F | -7.217224 | -0.768647 | -2.340881 |
| 71 | F | -8.613741 | -0.449161 | -0.012781 |
| 72 | H | 5.914923 | 3.228215 | -0.443273 |
| 73 | O | 6.717577 | 5.67218 | -0.361195 |
| 74 | N | 4.613507 | 7.711044 | 0.037479 |
| 75 | O | 5.685323 | 8.10478 | 0.501952 |
| 76 | O | 3.692892 | 8.482001 | -0.303649 |
| 77 | H | 6.133852 | -2.500391 | 0.712656 |
| 78 | N | 5.618464 | -7.002442 | -0.17978 |
| 79 | O | 6.860504 | -7.198647 | -0.123245 |
| 80 | O | 4.82455 | -7.913727 | -0.410374 |
| 81 | O | 7.351588 | -4.718085 | 0.386118 |
| 82 | H | 7.567076 | -5.667549 | 0.219772 |

**42-**

Total energy E=-2819.8776 Hartree

Imaginary Frequency: 0

| Tag | Symbol | X | Y | Z |
| --- | --- | --- | --- | --- |
| 1 | C | -2.569169 | -2.621446 | -0.275324 |
| 2 | C | -3.394976 | -1.503263 | -0.339196 |
| 3 | C | -2.557939 | -0.336269 | -0.223625 |
| 4 | N | -1.254516 | -0.761091 | -0.111657 |
| 5 | C | -1.222411 | -2.148271 | -0.123939 |
| 6 | C | 1.222958 | -2.147921 | 0.123935 |
| 7 | C | 2.569849 | -2.620719 | 0.27531 |
| 8 | N | 1.254671 | -0.760732 | 0.111651 |
| 9 | C | 3.395341 | -1.502304 | 0.339186 |
| 10 | C | 2.557976 | -0.335546 | 0.223619 |
| 11 | C | 0.000373 | -2.834635 | -0.000001 |
| 12 | B | -0.000053 | 0.156083 | -0.000004 |
| 13 | F | 0.09977 | 0.971325 | -1.1435 |
| 14 | F | -0.100111 | 0.971299 | 1.14349 |
| 15 | C | 3.044704 | -4.04559 | 0.366939 |
| 16 | H | 2.510459 | -4.620058 | 1.13245 |
| 17 | H | 2.933384 | -4.584551 | -0.583166 |
| 18 | H | 4.107504 | -4.079162 | 0.624255 |
| 19 | C | -3.043636 | -4.046446 | -0.366969 |
| 20 | H | -2.50923 | -4.620764 | -1.132479 |
| 21 | H | -2.932182 | -4.585383 | 0.583134 |
| 22 | H | -4.106424 | -4.080301 | -0.624296 |
| 23 | C | 4.886094 | -1.536901 | 0.55644 |
| 24 | H | 5.137747 | -2.397331 | 1.191046 |
| 25 | H | 5.198126 | -0.656886 | 1.12804 |
| 26 | C | 5.714446 | -1.635556 | -0.740798 |
| 27 | H | 6.789981 | -1.633795 | -0.520073 |
| 28 | H | 5.477325 | -2.559031 | -1.28342 |
| 29 | H | 5.505555 | -0.798331 | -1.415809 |
| 30 | C | -4.885717 | -1.53829 | -0.556463 |
| 31 | H | -5.137112 | -2.39879 | -1.191077 |
| 32 | H | -5.198001 | -0.658364 | -1.128061 |
| 33 | C | -5.714053 | -1.637203 | 0.740766 |
| 34 | H | -6.789586 | -1.635747 | 0.520032 |
| 35 | H | -5.476672 | -2.560619 | 1.283376 |
| 36 | H | -5.505408 | -0.79993 | 1.415794 |
| 37 | C | -2.889151 | 1.056678 | -0.250209 |
| 38 | C | -4.144394 | 1.597892 | -0.106785 |
| 39 | H | -2.046599 | 1.727761 | -0.374134 |
| 40 | H | -4.976404 | 0.931702 | 0.097094 |
| 41 | C | 2.888811 | 1.057489 | 0.2502 |
| 42 | C | 4.143914 | 1.599029 | 0.10678 |
| 43 | H | 2.046081 | 1.728349 | 0.37412 |
| 44 | H | 4.976098 | 0.933052 | -0.097088 |
| 45 | C | -4.526935 | 2.981351 | -0.167723 |
| 46 | C | -5.878251 | 3.313657 | 0.015041 |
| 47 | C | -3.619269 | 4.068347 | -0.414036 |
| 48 | C | -6.354078 | 4.624875 | -0.023629 |
| 49 | H | -6.601035 | 2.526 | 0.202749 |
| 50 | C | -4.057827 | 5.358399 | -0.471718 |
| 51 | H | -2.562047 | 3.857112 | -0.558016 |
| 52 | C | -5.458606 | 5.762567 | -0.295219 |
| 53 | C | 4.526096 | 2.982588 | 0.167716 |
| 54 | C | 3.618147 | 4.06935 | 0.414018 |
| 55 | C | 5.877328 | 3.315241 | -0.015035 |
| 56 | C | 4.056371 | 5.359515 | 0.4717 |
| 57 | H | 2.560979 | 3.857842 | 0.557992 |
| 58 | C | 6.352816 | 4.626582 | 0.023635 |
| 59 | H | 6.600317 | 2.527771 | -0.202731 |
| 60 | C | 5.457046 | 5.764045 | 0.295203 |
| 61 | C | 0.000599 | -4.32734 | 0.000002 |
| 62 | C | -0.262275 | -5.066781 | 1.158152 |
| 63 | C | 0.263713 | -5.066706 | -1.158141 |
| 64 | C | -0.265126 | -6.459798 | 1.172756 |
| 65 | F | -0.523559 | -4.43754 | 2.316548 |
| 66 | C | 0.267 | -6.459722 | -1.172736 |
| 67 | F | 0.52481 | -4.43739 | -2.316539 |
| 68 | C | 0.001044 | -7.159919 | 0.000012 |
| 69 | F | -0.522254 | -7.136338 | 2.308526 |
| 70 | F | 0.524345 | -7.136189 | -2.308501 |
| 71 | F | 0.001256 | -8.504976 | 0.000016 |
| 72 | H | -3.366715 | 6.175687 | -0.66291 |
| 73 | O | -5.79287 | 6.957567 | -0.404087 |
| 74 | N | -7.765467 | 4.806424 | 0.191432 |
| 75 | O | -8.210799 | 5.940715 | 0.412495 |
| 76 | O | -8.510606 | 3.795062 | 0.158323 |
| 77 | H | 3.365047 | 6.176625 | 0.662885 |
| 78 | N | 7.764162 | 4.808491 | -0.191403 |
| 79 | O | 8.209215 | 5.942899 | -0.412431 |
| 80 | O | 8.509554 | 3.797314 | -0.158302 |
| 81 | O | 5.791 | 6.959131 | 0.40408 |

- 1. TDDFT results

**4-H2**

| No. | Energy  (cm-1) | Wavelength  (nm) | f | Major contributionss |
| --- | --- | --- | --- | --- |
| 1 | 15847 | 631 | 1.1231 | HOMO->LUMO (100%) |
| 2 | 17201 | 581 | 0.0009 | HOMO->L+1 (99%) |
| 3 | 17247 | 580 | 0.004 | HOMO->L+2 (98%) |
| 4 | 23869 | 419 | 0.368 | H-1->LUMO (89%), HOMO->L+3 (10%) |
| 5 | 23956 | 417 | 0.0371 | H-2->LUMO (98%) |
| 6 | 25519 | 392 | 0.06 | H-1->L+1 (90%) |
| 7 | 25572 | 391 | 0.0035 | H-1->L+2 (88%) |
| 8 | 26046 | 384 | 0.0235 | H-3->LUMO (98%) |
| 9 | 28166 | 355 | 1.6052 | H-1->LUMO (10%), HOMO->L+3 (86%) |
| 10 | 28189 | 355 | 0.0047 | H-4->LUMO (85%) |
| 11 | 29324 | 341 | 0.0058 | H-2->L+1 (90%) |
| 12 | 29337 | 341 | 0.0034 | H-2->L+2 (88%) |

**4-H-**

| No. | Energy  (cm-1) | Wavelength  (nm) | f | Major contributions |
| --- | --- | --- | --- | --- |
| 1 | 12732 | 785 | 0.0803 | HOMO->LUMO (89%), HOMO->L+1 (10%) |
| 2 | 13891 | 720 | 1.2248 | HOMO->LUMO (10%), HOMO->L+1 (90%) |
| 3 | 20218 | 495 | 0.0729 | H-1->LUMO (94%) |
| 4 | 20680 | 484 | 0.1086 | H-1->L+1 (41%), HOMO->L+2 (54%) |
| 5 | 20882 | 479 | 0.2304 | H-1->L+1 (48%), HOMO->L+2 (42%) |
| 6 | 24922 | 401 | 0.0341 | H-3->LUMO (26%), H-3->L+1 (67%) |
| 7 | 25134 | 398 | 0.0059 | H-2->LUMO (26%), H-2->L+1 (66%) |
| 8 | 25429 | 393 | 0.9251 | HOMO->L+3 (81%) |
| 9 | 25869 | 387 | 0.0696 | HOMO->L+4 (93%) |
| 10 | 26665 | 375 | 0.0223 | H-4->LUMO (73%) |
| 11 | 27166 | 368 | 0.0775 | H-5->LUMO (16%), H-5->L+1 (37%), H-2->L+2 (14%), H-1->L+2 (13%) |
| 12 | 27209 | 368 | 0.1391 | H-5->L+1 (10%), H-2->L+2 (52%), H-1->L+2 (12%) |

**42-**

| No. | Energy  (cm-1) | Wavelength  (nm) | f | Major contributions |
| --- | --- | --- | --- | --- |
| 1 | 12767 | 783 | 1.3499 | HOMO->LUMO (101%) |
| 2 | 18334 | 545 | 0.5059 | H-1->LUMO (91%) |
| 3 | 19619 | 510 | 0.1503 | HOMO->L+1 (91%) |
| 4 | 19853 | 504 | 0.0558 | HOMO->L+2 (98%) |
| 5 | 23559 | 424 | 0.0261 | H-2->LUMO (88%) |
| 6 | 23827 | 420 | 0.0049 | HOMO->L+3 (98%) |
| 7 | 24960 | 401 | 0.0608 | H-1->L+1 (78%) |
| 8 | 25265 | 396 | 0 | H-4->L+1 (10%), H-3->LUMO (17%), H-1->L+2 (52%) |
| 9 | 25575 | 391 | 0.0286 | H-4->LUMO (75%), H-1->L+1 (10%) |
| 10 | 25599 | 391 | 0.0912 | H-3->LUMO (57%), H-1->L+2 (18%), HOMO->L+4 (16%) |
| 11 | 25790 | 388 | 0.0285 | H-5->LUMO (85%) |
| 12 | 25923 | 386 | 0.6509 | H-3->LUMO (16%), HOMO->L+4 (58%) |

- 1. Total electronic density differences

**Fig. S15** Total electronic density difference Sn-S0 of BODIPY **4** (isovalue 0.0004); Blue = decrease of electronic density, Orange = increase of electronic density

- 1. Calculated spectra


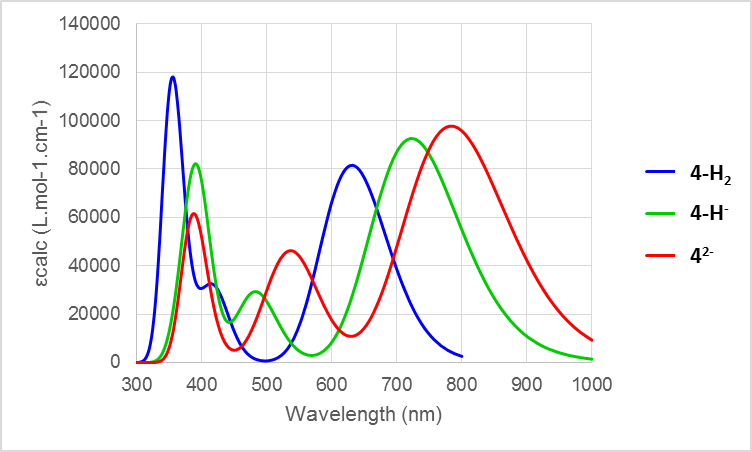


**Fig. S16** Calculated electronic spectra at the PBE0/6-311+g(d,p) with dichoromethane solvent effect (IEFPCM)

# UV–vis absorption and emission spectra of 4

**Fig. S17** Normalized absorption and fluorescence emission spectra of BODIPY **4** in 1,1,2,2-tetrachloroethane.

**Fig. S18** Normalized absorption, fluorescence emission and excitation spectra of BODIPY **4** in *n*‑hexane.


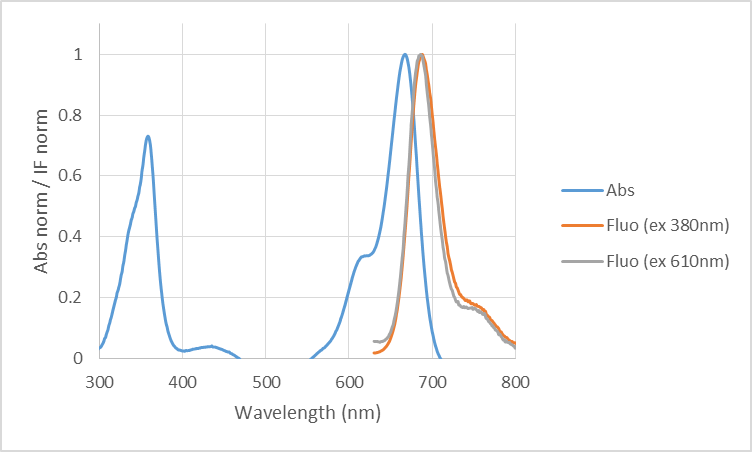


**Fig. S19** Normalized absorption and fluorescence emission spectra of BODIPY **4** in chloroform.


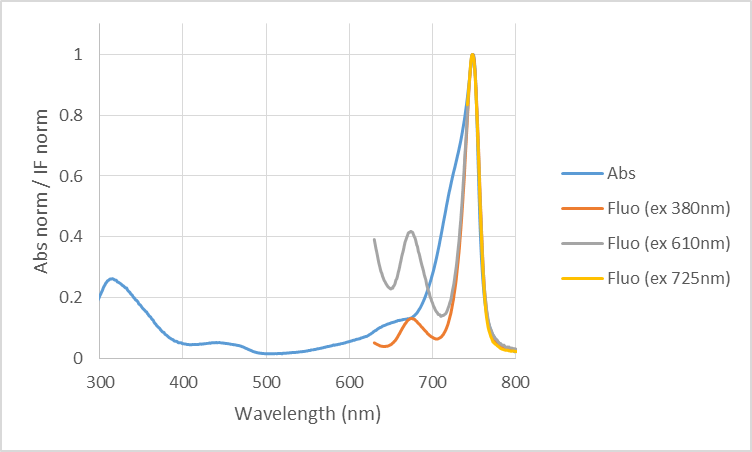


**Fig. S20** Normalized absorption, fluorescence emission and excitation spectra of BODIPY **4** in *n*‑pentane.


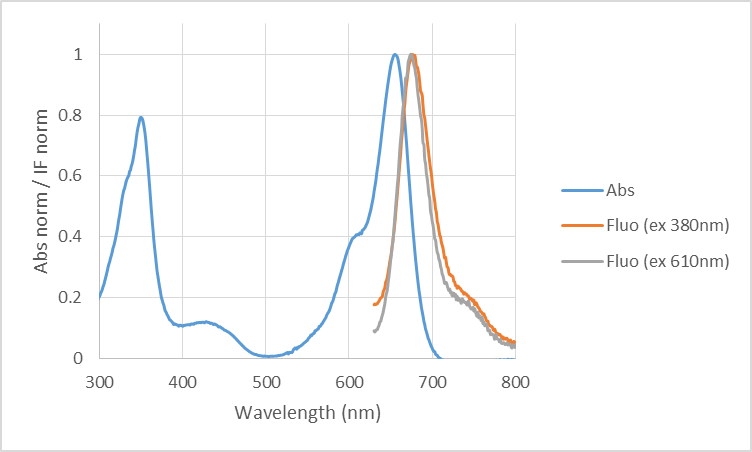


**Fig. S21** Normalized absorption and fluorescence emission spectra of BODIPY **4** in 2,2,2-trifluoroethanol.


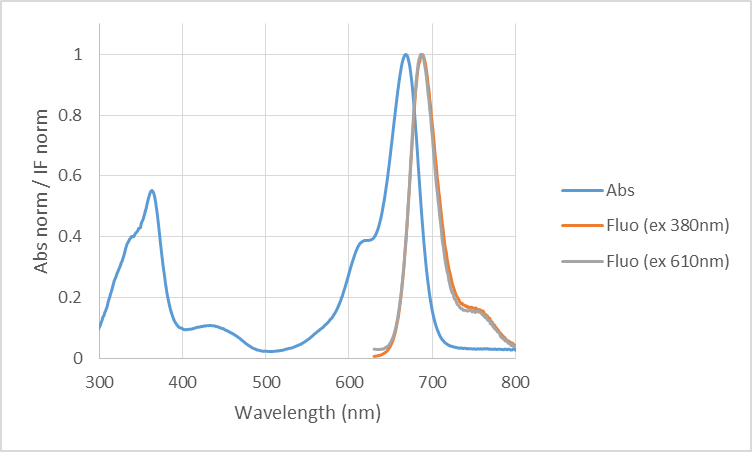


**Fig. S22** Normalized absorption and fluorescence emission spectra of BODIPY **4** in toluene.


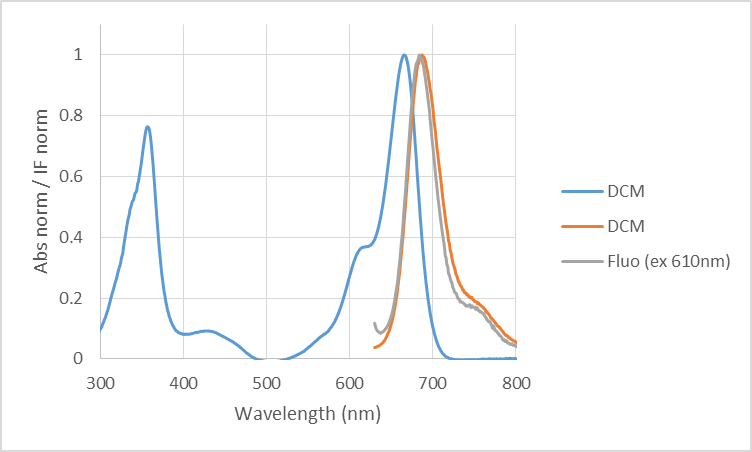


**Fig. S23** Normalized absorption and fluorescence emission spectra of BODIPY **4** in dichloromethane.


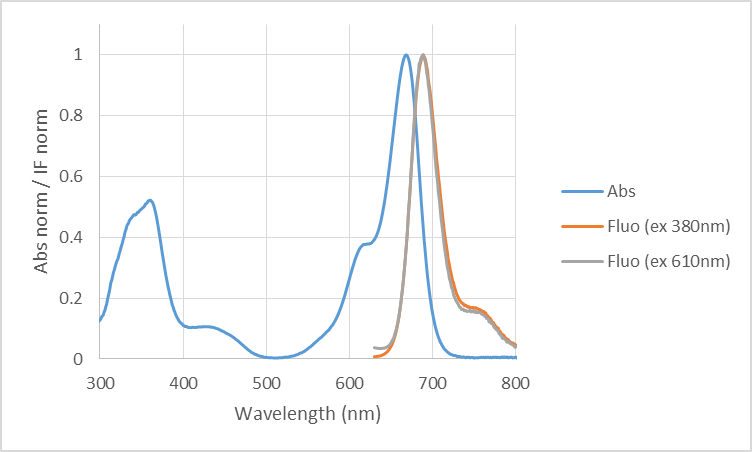


**Fig. S24** Normalized absorption and fluorescence emission spectra of BODIPY **4** in mesitylene.


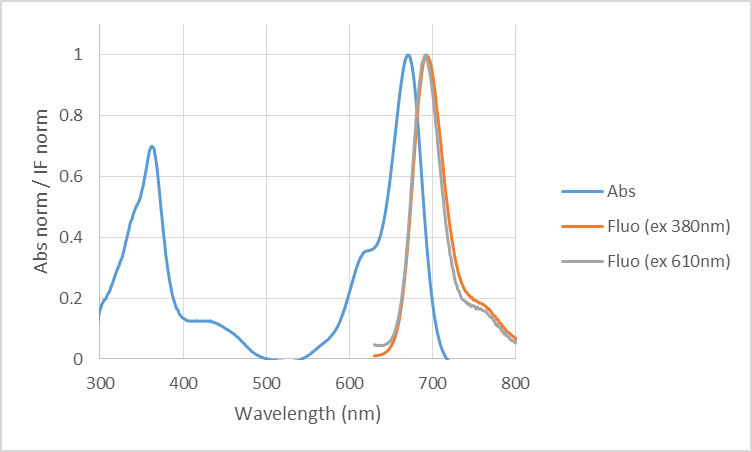


**Fig. S25** Normalized absorption and fluorescence emission spectra of BODIPY **4** in benzonitrile.


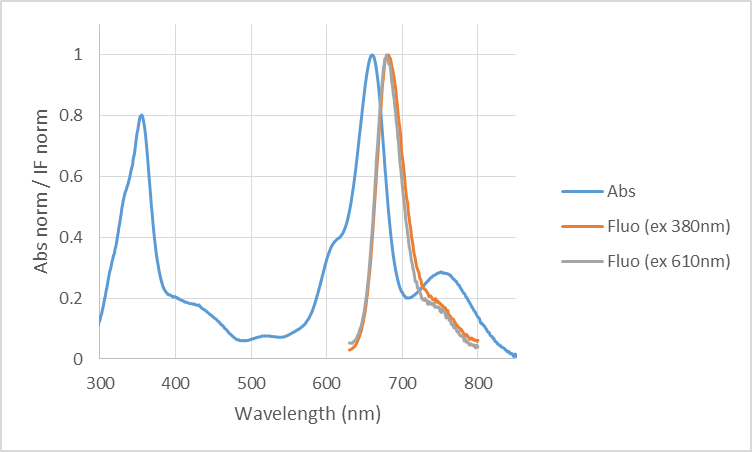


**Fig. S26** Normalized absorption and fluorescence emission spectra of BODIPY **4** in acetonitrile.


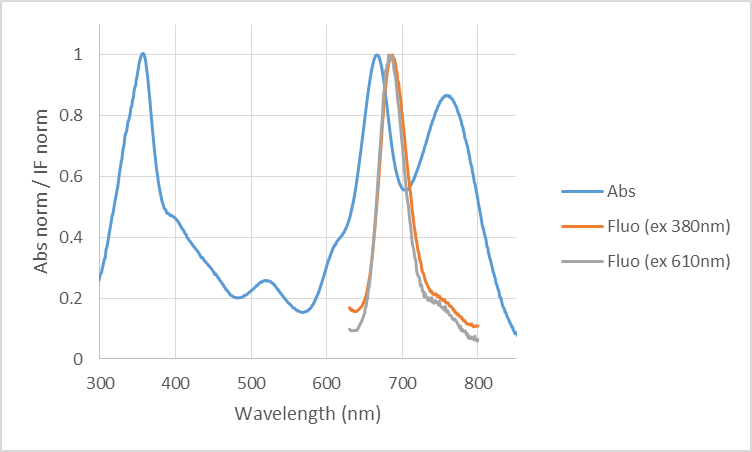


**Fig. S27** Normalized absorption and fluorescence emission spectra of BODIPY **4** in propylene carbonate.


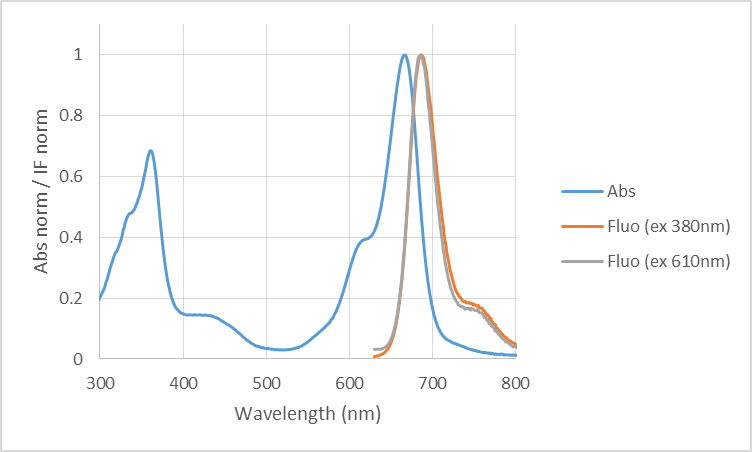


**Fig. S28** Normalized absorption and fluorescence emission spectra of BODIPY **4** in 1,4-dioxane.


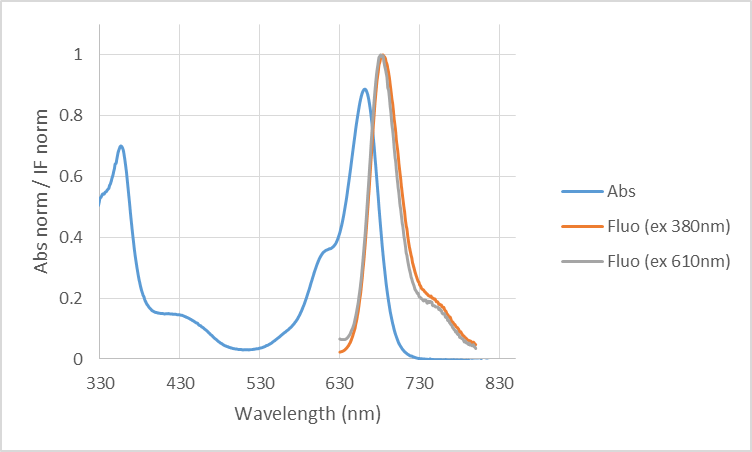


**Fig. S29** Normalized absorption and fluorescence emission spectra of BODIPY **4** in acetone.


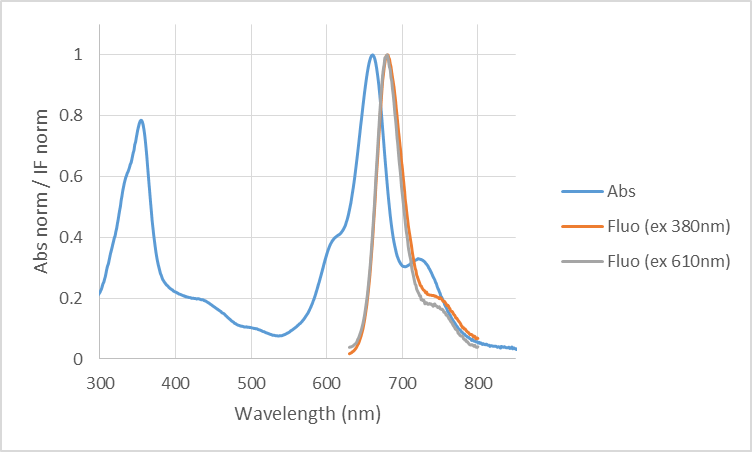


**Fig. S30** Normalized absorption and fluorescence emission spectra of BODIPY **4** in ethyl acetate.


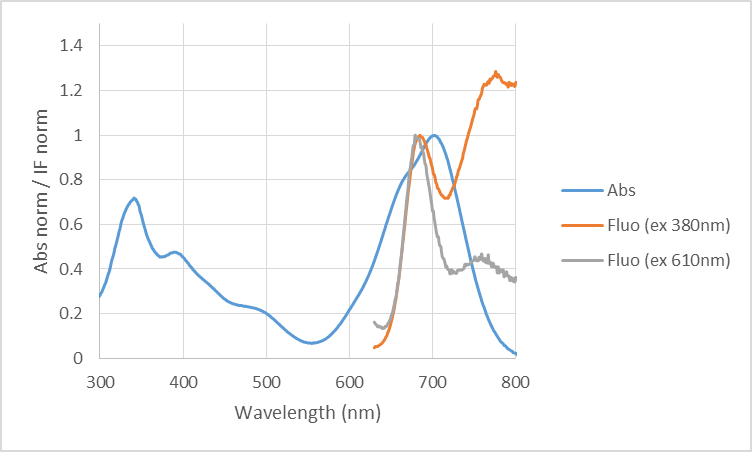


**Fig. S31** Normalized absorption and fluorescence emission spectra of BODIPY **4** in methanol.


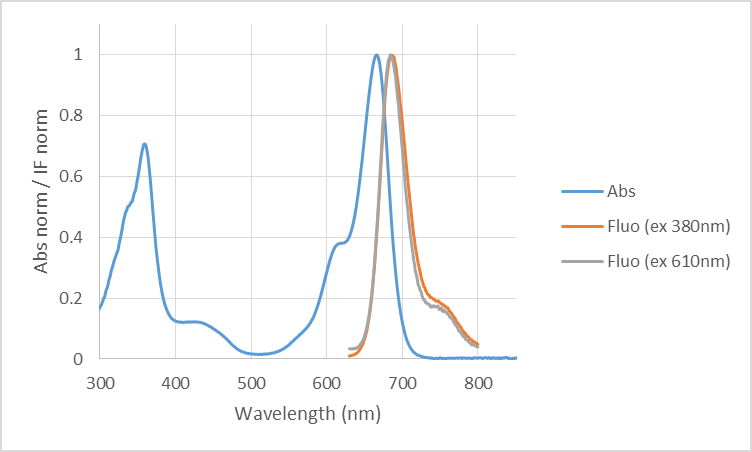


**Fig. S32** Normalized absorption and fluorescence emission spectra of BODIPY **4** in tetrahydrofuran.


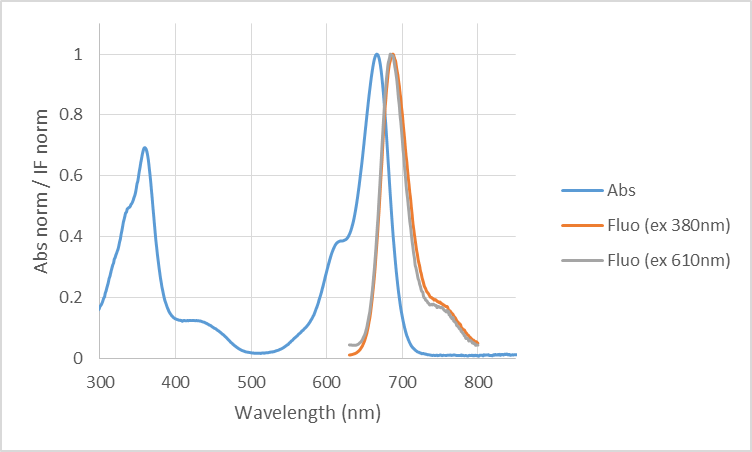


**Fig. S33** Normalized absorption and fluorescence emission spectra of BODIPY **4** in tetrahydrofuran and 30µL of water.


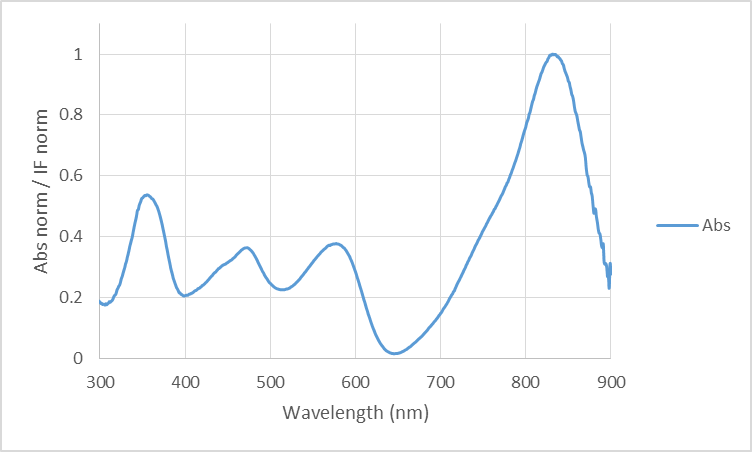


**Fig. S34** Normalized absorption spectra of BODIPY **4** in N,N-dimethylformamide.


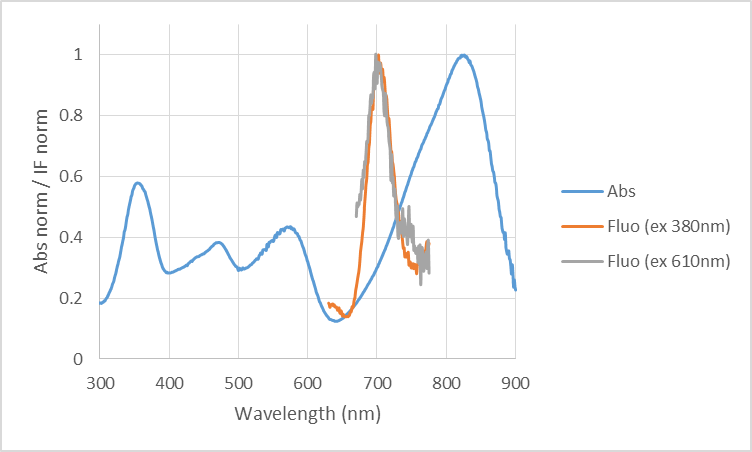


**Fig. S35** Normalized absorption spectra of BODIPY **4** in dimethyl sulfoxide.


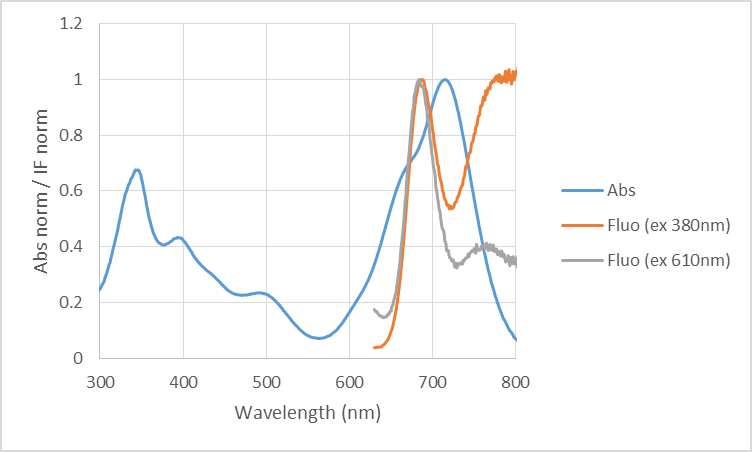


**Fig. S36** Normalized absorption spectra of BODIPY **4** in ethanol.

# Solvatochromism

- 1. Lippert-Mataga

The Lippert-Mataga equation describes the solvatochromic Stokes shift (expressed in wavenumbers) as a function of the change of the dipole moment of the dye upon excitation. The validity of the equation can be checked by using various solvents with different dielectric constants (ε) and refractive indices (n) and by plotting as a function of :

with and

where h is the Planck’s constant, c the velocity of light, ε0 is the permittivity of vacuum, and a represents the radius of the cavity in which the solute resides. μg and μe are the dipole moments of the dye in ground and excited states, respectively.

The analysis was done on the phenol band since it is the only fluorescent one in the solvatochromic study. Similarly *N,N*-dimethylformamide was excluded since BODIPY **4** is not fluorescent in that solvent.

**Fig. S37** Stokes shift of BODIPY **4** versus the Lippert solvent parameter .

The correlation coefficient is very poor (0.24) and the Stokes shift is weakly dependent on Δf which indicates that the dye’s permanent dipole moments (if any) are similar in the ground and excited states.[[1]](#endnote-1)

- 1. Solvent polarity parameter ET(30)

Contrary to the Lippert-Mataga solvent parameter, the solvent polarity parameter ET(30) is a descriptor of both hydrogen bond and electrostatic interactions of solvents.[[2]](#endnote-2) It was thus also tested since the presence of phenols in BODIPY **4** must affect the solvent molecule interactions.

**Fig. S38** Solvent polarity parameter ET(30) versus (**a**) phenol absorption maxima, (**b**) phenolate absorption maxima and (**c**) Stokes shift () of BODIPY **4**.

There is no correlation for the absorption maxima of the phenol (r2=0.48) and phenolate (r2=0.16) or the Stokes shift (r2=0.16) with the ET(30) parameter.

- 1. Kamlet–Taft scale

Kamlet and Taft proposed to split the solvent effect in three different types of contributions: the π*, a and b parameters to characterize the polarity/polarizability, the acidity and the basicity, respectively, of a given solvent.[[3]](#endnote-3) The absorption maxima of the phenol and phenolate as well as emission maxima and Stokes shifts in the various solvents have been analyzed by the multiple linear regression resolution of the equation:

where y is the photophysical parameter, y0 the property of interest in the gas phase and aα, bβ, cπ* and d the adjustable coefficients that reflect the sensitivity of the physicochemical property y in a given solvent to the parameters α, β and π* respectively. **Table S1** reports the estimated coefficients, and the correlation between the calculated and experimental photophysical parameters are shown in **Figure S39**.

**Table S1** Estimated coefficients (y0, aα, bβ and cπ*), their standard errors and correlation coefficients (r2) for the multiple linear regression analyses of λabs of the phenol and phenolate bands, λem of the phenol and Stokes shift () as a function of the Kamlet–Taft solvent scale.

| Kamlet-Taft | y0 | aα | bβ | cπ | r2 |
| --- | --- | --- | --- | --- | --- |
| abs (phenol) | 14986 ± 83 | 239 ± 47 | 269 ± 101 | -88 ± 108 | 0.75 |
| abs (phenolate) | 16184 ± 664 | 1006 ± 431 | -2034 ± 894 | -2761 ± 973 | 0.95 |
| em (phenol) | 14779 ± 51 | 123 ± 50 | -127 ± 89 | -302 ± 80 | 0.65 |
|  | 454 ± 18 | 29 ± 39 | 7 ± 52 | -0.2 ± 0.7 | 0.08 |

**Fig. S39 a)** Linear relationship of the experimental () and calculated () absorption maxima of BODIPY **4 a)** phenol- and, **b)** phenolate-form absorption maxima, **c)** phenol-form fluorescence emission maxima, **d)** and Stokes shift () obtained by the multiple linear regression analysis according to Kamlet-Taft analysis.

The Kamlet-Taft scale gives a good correlation only for the phenolate absorption band (r2 = 0.95). The property mostly depends on β and π* parameters, which correlate with the basicity (hydrogen bond acceptor) and polarity/polarizability respectively. This is in line with the fact that the BODIPY must give a phenol hydrogen to the solvent to form a polar compound.

# References

1. (a) Lippert, E. (1955). Dipolmoment und Elektronenstruktur von angeregten Molekülen. *Z. Naturforsch., A: Phys. Sci.*, *10*, 541−545. (b) Mataga, N., Kaifu, Y., & Koizumi, M. (1955). The solvent effect on fluorescence spectrum – change of solute-solvent interaction during the lifetime of excited solute molecule. *Bull. Chem. Soc. Jpn.*, *28*, 690−691. (c) Mataga, N., Kaifu, Y., & Koizumi, M. (1956). Solvent effects upon fluorescence spectra and the dipole moments of excited molecules. *Bull. Chem. Soc. Jpn.*, *29*, 465−470. [↑](#endnote-ref-1)
2. Cerón-Carrasco, J. P., Jacquemin, D., Laurence, C., Planchat, A., Reichardt, C., & Sraïdi K. (2014). Solvent polarity scales: determination of new ET(30) values for 84 organic solvents. *J. Phys. Org. Chem.*, *27*, 512–518. [↑](#endnote-ref-2)
3. (a) Kamlet, M. J., & Taft, R.W. (1976). Solvatochromic comparison method. 1. β-Scale of solvent hydrogen-bond acceptor (HBA) basicities. *J. Am. Chem. Soc.*, *98*, 377–383; (b) Taft, R. W., & Kamlet M. J. (1976). Solvatochromic comparison method. 2. α-Scale of solvent hydrogen-bond donor (HBD) acidities. *J. Am. Chem. Soc.*, *98*, 2886–2894; (c) Kamlet, M. J., Abboud, J. L. M., & Taft, R. W. (1977). Solvatochromic comparison method. 6. π* Scale of solvent polarities. *J. Am. Chem. Soc.*, *99*, 6027–6038. [↑](#endnote-ref-3)
